# Supplementary material for: Roles of pigment epithelium-derived factor in exercise-induced suppression of senescence and its impact on lung pathology in mice
Source: Aging (Albany NY). 2024 Jun 26;16(13):10670–93. doi: 10.18632/aging.205976 (PMC11272117; doi:10.18632/aging.205976)
Supplement: Supplementary Table 1 [file aging-16-205976-s002.xlsx]

## Sheet: Supplementary Table 1
Supplementary Table 1. Mass spectrometry data.
Proteins with >4 identified peptide count, exclusively detected in C2C12-CM, <150 kD Mw are listed.
Uniprot Ac.	Protein Name	Gene Symbol	Species	Molecular Weight	Identified Peptide Count	Total Unique Peptide Count	Protein Group Score	Control med	C2C12-CM
Q7TPR4	Alpha-actinin-1	Actn1	Mus musculus	103 kDa	40	4	0.984817	ND	36768830
P57780	Alpha-actinin-4	Actn4	Mus musculus	105 kDa	39	21	0.986263	ND	186346800
O88990	Alpha-actinin-3	Actn3	Mus musculus	103 kDa	37	27	0.98627	ND	198656300
Q8CIE6	Coatomer subunit alpha	Copa	Mus musculus	138 kDa	32	5	0.983422	ND	10642460
Q01853	Transitional endoplasmic reticulum ATPase	Vcp	Mus musculus	89 kDa	31	31	0.987345	ND	879478700
P35441	Thrombospondin-1	Thbs1	Mus musculus	130 kDa	30	12	0.987229	ND	97346500
Q01149	Collagen alpha-2(I) chain	Col1a2	Mus musculus	130 kDa	30	30	0.985553	ND	344148600
P48678	Prelamin-A/C	Lmna	Mus musculus	74 kDa	29	29	0.987218	ND	1303656000
Q3U1J4	DNA damage-binding protein 1	Ddb1	Mus musculus	127 kDa	28	28	0.987286	ND	294281100
Q61768	Kinesin-1 heavy chain	Kif5b	Mus musculus	110 kDa	26	19	0.986347	ND	86831880
P08121	Collagen alpha-1(III) chain	Col3a1	Mus musculus	139 kDa	25	22	0.986607	ND	206299800
Q6ZQ38	Cullin-associated NEDD8-dissociated protein 1	Cand1	Mus musculus	136 kDa	25	25	0.98627	ND	125206700
Q61316	Heat shock 70 kDa protein 4	Hspa4	Mus musculus	94 kDa	24	23	0.987768	ND	198234900
Q8BU30	Isoleucine--tRNA ligase, cytoplasmic	Iars1	Mus musculus	144 kDa	24	24	0.985465	ND	119608100
Q8BMJ2	Leucine--tRNA ligase, cytoplasmic	Lars1	Mus musculus	134 kDa	24	24	0.986667	ND	80387770
Q9JI91	Alpha-actinin-2	Actn2	Mus musculus	104 kDa	24	10	0.983508	ND	7350983
P10493	Nidogen-1	Nid1	Mus musculus	137 kDa	23	15	0.987853	ND	184920900
Q11011	Puromycin-sensitive aminopeptidase	Npepps	Mus musculus	103 kDa	23	4	0.982865	ND	11261550
Q78PY7	Staphylococcal nuclease domain-containing protein 1	Snd1	Mus musculus	102 kDa	23	23	0.987361	ND	114713700
P14824	Annexin A6	Anxa6	Mus musculus	76 kDa	22	21	0.9876	ND	740517700
P11983	T-complex protein 1 subunit alpha	Tcp1	Mus musculus	60 kDa	22	6	0.986188	ND	73205370
Q921M3	Splicing factor 3B subunit 3	Sf3b3	Mus musculus	136 kDa	22	22	0.986641	ND	120650900
Q02053	Ubiquitin-like modifier-activating enzyme 1	Uba1	Mus musculus	118 kDa	22	22	0.987066	ND	142165400
Q9JIF7	Coatomer subunit beta	Copb1	Mus musculus	107 kDa	22	22	0.98645	ND	74765230
Q8VDM4	26S proteasome non-ATPase regulatory subunit 2	Psmd2	Mus musculus	100 kDa	22	22	0.985246	ND	66418420
Q9ER72	Cysteine--tRNA ligase, cytoplasmic	Cars1	Mus musculus	95 kDa	21	21	0.984293	ND	71278210
Q922B2	Aspartate--tRNA ligase, cytoplasmic	Dars1	Mus musculus	57 kDa	21	6	0.986122	ND	55888210
P13595	Neural cell adhesion molecule 1	Ncam1	Mus musculus	119 kDa	21	9	0.986763	ND	529476200
Q9ERK4	Exportin-2	Cse1l	Mus musculus	110 kDa	21	21	0.986206	ND	67377080
Q3TXS7	26S proteasome non-ATPase regulatory subunit 1	Psmd1	Mus musculus	106 kDa	21	21	0.986881	ND	81819100
Q9WVK4	EH domain-containing protein 1	Ehd1	Mus musculus	61 kDa	20	12	0.986123	ND	54575250
P42932	T-complex protein 1 subunit theta	Cct8	Mus musculus	60 kDa	20	20	0.987886	ND	375862800
O08788	Dynactin subunit 1	Dctn1	Mus musculus	142 kDa	20	20	0.985431	ND	27749910
Q8BKC5	Importin-5	Ipo5	Mus musculus	124 kDa	20	20	0.985168	ND	55724910
Q9DBG3	AP-2 complex subunit beta	Ap2b1	Mus musculus	105 kDa	20	10	0.985661	ND	35170830
O35643	AP-1 complex subunit beta-1	Ap1b1	Mus musculus	104 kDa	20	10	0.984675	ND	21304770
Q9EQH3	Vacuolar protein sorting-associated protein 35	Vps35	Mus musculus	92 kDa	19	19	0.986129	ND	57427640
P08113	Endoplasmin	Hsp90b1	Mus musculus	92 kDa	19	4	0.985554	ND	7112256
Q8JZQ9	Eukaryotic translation initiation factor 3 subunit B	Eif3b	Mus musculus	91 kDa	19	19	0.986618	ND	105849900
Q9D0I9	Arginine--tRNA ligase, cytoplasmic	Rars1	Mus musculus	76 kDa	19	19	0.986964	ND	118859600
P80314	T-complex protein 1 subunit beta	Cct2	Mus musculus	57 kDa	19	19	0.986793	ND	167744600
O08810	116 kDa U5 small nuclear ribonucleoprotein component	Eftud2	Mus musculus	109 kDa	19	19	0.982995	ND	30710140
Q8BGQ7	Alanine--tRNA ligase, cytoplasmic	Aars1	Mus musculus	107 kDa	19	19	0.985754	ND	112105400
P26231	Catenin alpha-1	Ctnna1	Mus musculus	100 kDa	19	17	0.987041	ND	85740410
Q9WV91	Prostaglandin F2 receptor negative regulator	Ptgfrn	Mus musculus	99 kDa	18	18	0.986257	ND	65651630
P56399	Ubiquitin carboxyl-terminal hydrolase 5	Usp5	Mus musculus	96 kDa	18	18	0.986763	ND	102674000
Q8BML9	Glutamine--tRNA ligase	Qars1	Mus musculus	88 kDa	18	18	0.986365	ND	79707340
Q9R0E2	Procollagen-lysine,2-oxoglutarate 5-dioxygenase 1	Plod1	Mus musculus	84 kDa	18	17	0.987583	ND	65186540
Q8BND5	Sulfhydryl oxidase 1	Qsox1	Mus musculus	83 kDa	18	16	0.987227	ND	141352600
P14733	Lamin-B1	Lmnb1	Mus musculus	67 kDa	18	18	0.987375	ND	101136600
Q76MZ3	Serine/threonine-protein phosphatase 2A 65 kDa regulatory subunit A alpha isoform	Ppp2r1a	Mus musculus	65 kDa	18	18	0.986358	ND	130797400
Q9EQP2	EH domain-containing protein 4	Ehd4	Mus musculus	61 kDa	18	14	0.986863	ND	113645100
Q61207	Prosaposin	Psap	Mus musculus	61 kDa	18	18	0.986341	ND	563190300
P27773	Protein disulfide-isomerase A3	Pdia3	Mus musculus	57 kDa	18	11	0.985565	ND	276490300
Q9CWF2	Tubulin beta-2B chain	Tubb2b	Mus musculus	50 kDa	18	1	0.987444	ND	22710160
Q64514	Tripeptidyl-peptidase 2	Tpp2	Mus musculus	140 kDa	18	18	0.984366	ND	50360190
Q8R2G6	Coiled-coil domain-containing protein 80	Ccdc80	Mus musculus	108 kDa	18	18	0.985775	ND	67226480
Q8CGY6	Protein unc-45 homolog B	Unc45b	Mus musculus	104 kDa	18	18	0.97992	ND	20308430
Q9WUB3	Glycogen phosphorylase, muscle form	Pygm	Mus musculus	97 kDa	17	12	0.985592	ND	23261090
P12023	Amyloid-beta A4 protein	App	Mus musculus	87 kDa	17	17	0.986815	ND	182359400
Q99KI0	Aconitate hydratase, mitochondrial	Aco2	Mus musculus	85 kDa	17	4	0.986583	ND	8411323
Q61508	Extracellular matrix protein 1	Ecm1	Mus musculus	63 kDa	17	15	0.986764	ND	142530200
P80318	T-complex protein 1 subunit gamma	Cct3	Mus musculus	61 kDa	17	17	0.986461	ND	202420900
Q9R045	Angiopoietin-related protein 2	Angptl2	Mus musculus	57 kDa	17	17	0.986915	ND	106682500
Q5XJY5	Coatomer subunit delta	Arcn1	Mus musculus	57 kDa	17	17	0.986241	ND	102189000
P31001	Desmin	Des	Mus musculus	53 kDa	17	5	0.985952	ND	974928300
P30416	Peptidyl-prolyl cis-trans isomerase FKBP4	Fkbp4	Mus musculus	52 kDa	17	17	0.985791	ND	71293630
Q9ERD7	Tubulin beta-3 chain	Tubb3	Mus musculus	50 kDa	17	4	0.986465	ND	5416169
P37889	Fibulin-2	Fbln2	Mus musculus	132 kDa	17	17	0.986616	ND	144153700
Q640N1	Adipocyte enhancer-binding protein 1	Aebp1	Mus musculus	128 kDa	17	17	0.985667	ND	154536000
Q8R1B4	Eukaryotic translation initiation factor 3 subunit C	Eif3c	Mus musculus	106 kDa	17	17	0.984363	ND	37956990
O55029	Coatomer subunit beta'	Copb2	Mus musculus	102 kDa	17	17	0.986172	ND	57074930
Q9QZE5	Coatomer subunit gamma-1	Copg1	Mus musculus	98 kDa	16	15	0.985169	ND	34734110
Q9EQK5	Major vault protein	Mvp	Mus musculus	96 kDa	16	16	0.985499	ND	41881580
Q9WU78	Programmed cell death 6-interacting protein	Pdcd6ip	Mus musculus	96 kDa	16	16	0.985466	ND	71698680
P70428	Exostosin-2	Ext2	Mus musculus	82 kDa	16	16	0.984324	ND	37782650
Q9QUR6	Prolyl endopeptidase	Prep	Mus musculus	81 kDa	16	16	0.986607	ND	104772800
Q62167	ATP-dependent RNA helicase DDX3X	Ddx3x	Mus musculus	73 kDa	16	6	0.969428	ND	12279010
O88342	WD repeat-containing protein 1	Wdr1	Mus musculus	66 kDa	16	7	0.986645	ND	55924980
Q60864	Stress-induced-phosphoprotein 1	Stip1	Mus musculus	63 kDa	16	16	0.986143	ND	128546800
O08553	Dihydropyrimidinase-related protein 2	Dpysl2	Mus musculus	62 kDa	16	13	0.986653	ND	107951500
Q9QZF2	Glypican-1	Gpc1	Mus musculus	61 kDa	16	16	0.987363	ND	1007614000
P09103	Protein disulfide-isomerase	P4hb	Mus musculus	57 kDa	16	7	0.982366	ND	62473630
P50247	Adenosylhomocysteinase	Ahcy	Mus musculus	48 kDa	16	7	0.98765	ND	59812380
P05064	Fructose-bisphosphate aldolase A	Aldoa	Mus musculus	39 kDa	16	5	0.984997	ND	161421700
Q5SUR0	Phosphoribosylformylglycinamidine synthase	Pfas	Mus musculus	145 kDa	16	16	0.985812	ND	34677300
Q91V92	ATP-citrate synthase	Acly	Mus musculus	120 kDa	16	16	0.983539	ND	32181380
P17710	Hexokinase-1	Hk1	Mus musculus	108 kDa	16	14	0.98706	ND	33316900
O08746	Matrilin-2	Matn2	Mus musculus	107 kDa	16	13	0.985757	ND	56183280
P39054	Dynamin-2	Dnm2	Mus musculus	98 kDa	15	1	0.95012	ND	864698
P97311	DNA replication licensing factor MCM6	Mcm6	Mus musculus	93 kDa	15	15	0.984917	ND	23129480
O35286	Pre-mRNA-splicing factor ATP-dependent RNA helicase DHX15	Dhx15	Mus musculus	91 kDa	15	14	0.98633	ND	31739300
O35350	Calpain-1 catalytic subunit	Capn1	Mus musculus	82 kDa	15	9	0.985209	ND	22768260
Q9CZD3	Glycine--tRNA ligase	Gars1	Mus musculus	82 kDa	15	5	0.984647	ND	65759980
P38647	Stress-70 protein, mitochondrial	Hspa9	Mus musculus	73 kDa	15	15	0.987347	ND	110471900
Q61656	Probable ATP-dependent RNA helicase DDX5	Ddx5	Mus musculus	69 kDa	15	9	0.986966	ND	47753340
Q8BP47	Asparagine--tRNA ligase, cytoplasmic	NARS1	Mus musculus	64 kDa	15	15	0.986108	ND	209120000
Q91WQ3	Tyrosine--tRNA ligase, cytoplasmic	Yars1	Mus musculus	59 kDa	15	15	0.985372	ND	96165090
Q9WV80	Sorting nexin-1	Snx1	Mus musculus	59 kDa	15	13	0.984034	ND	19056160
Q9CZN7	Serine hydroxymethyltransferase, mitochondrial	Shmt2	Mus musculus	56 kDa	15	7	0.985207	ND	34451870
Q922F4	Tubulin beta-6 chain	Tubb6	Mus musculus	50 kDa	15	5	0.98736	ND	31238650
Q8BWY3	Eukaryotic peptide chain release factor subunit 1	Etf1	Mus musculus	49 kDa	15	15	0.987617	ND	96454190
P97298	Pigment epithelium-derived factor	Serpinf1	Mus musculus	46 kDa	15	13	0.987707	ND	650002200
P09411	Phosphoglycerate kinase 1	Pgk1	Mus musculus	45 kDa	15	4	0.986135	ND	150390500
Q9JIF0	Protein arginine N-methyltransferase 1	Prmt1	Mus musculus	42 kDa	15	13	0.986823	ND	104554400
Q99K85	Phosphoserine aminotransferase	Psat1	Mus musculus	40 kDa	15	15	0.987322	ND	270400100
P07356	Annexin A2	Anxa2	Mus musculus	39 kDa	15	3	0.986321	ND	64536210
P06151	L-lactate dehydrogenase A chain	Ldha	Mus musculus	36 kDa	15	8	0.984819	ND	151193500
Q99NB9	Splicing factor 3B subunit 1	Sf3b1	Mus musculus	146 kDa	15	15	0.982113	ND	18968300
Q3U7R1	Extended synaptotagmin-1	Esyt1	Mus musculus	122 kDa	15	15	0.985963	ND	53510010
Q91ZW3	SWI/SNF-related matrix-associated actin-dependent regulator of chromatin subfamily A member 5	Smarca5	Mus musculus	122 kDa	15	15	0.983091	ND	21249570
P17426	AP-2 complex subunit alpha-1	Ap2a1	Mus musculus	108 kDa	15	13	0.98417	ND	38148390
Q62009	Periostin	Postn	Mus musculus	93 kDa	14	8	0.984661	ND	17842900
P70275	Semaphorin-3E	Sema3e	Mus musculus	90 kDa	14	14	0.984532	ND	182824900
P09055	Integrin beta-1	Itgb1	Mus musculus	88 kDa	14	6	0.985244	ND	37265360
Q8BH04	Phosphoenolpyruvate carboxykinase [GTP], mitochondrial	Pck2	Mus musculus	71 kDa	14	5	0.986744	ND	22108470
Q7TMK9	Heterogeneous nuclear ribonucleoprotein Q	Syncrip	Mus musculus	70 kDa	14	12	0.987058	ND	42622430
P26040	Ezrin	Ezr	Mus musculus	69 kDa	14	8	0.986739	ND	48473830
Q00612	Glucose-6-phosphate 1-dehydrogenase X	G6pdx	Mus musculus	59 kDa	14	5	0.980182	ND	8848825
P80315	T-complex protein 1 subunit delta	Cct4	Mus musculus	58 kDa	14	13	0.987287	ND	100542300
Q9Z1N5	Spliceosome RNA helicase Ddx39b	Ddx39b	Mus musculus	49 kDa	14	8	0.984353	ND	83187170
P10107	Annexin A1	Anxa1	Mus musculus	39 kDa	14	14	0.986398	ND	981813900
P62137	Serine/threonine-protein phosphatase PP1-alpha catalytic subunit	Ppp1ca	Mus musculus	38 kDa	14	3	0.98696	ND	17432870
Q05D44	Eukaryotic translation initiation factor 5B	Eif5b	Mus musculus	138 kDa	14	14	0.983697	ND	36385940
Q3UPL0	Protein transport protein Sec31A	Sec31a	Mus musculus	134 kDa	14	14	0.985538	ND	19058490
Q6DIB5	Multiple epidermal growth factor-like domains protein 10	Megf10	Mus musculus	123 kDa	14	7	0.985618	ND	58267410
Q9EPL8	Importin-7	Ipo7	Mus musculus	119 kDa	14	12	0.985841	ND	41229960
Q8BKG3	Inactive tyrosine-protein kinase 7	Ptk7	Mus musculus	118 kDa	14	14	0.985842	ND	27124310
P98063	Bone morphogenetic protein 1	Bmp1	Mus musculus	112 kDa	14	14	0.983642	ND	31530000
A2A432	Cullin-4B	Cul4b	Mus musculus	111 kDa	14	9	0.977732	ND	6890967
Q04857	Collagen alpha-1(VI) chain	Col6a1	Mus musculus	108 kDa	14	10	0.986202	ND	74656050
Q9Z1Z0	General vesicular transport factor p115	Uso1	Mus musculus	107 kDa	14	14	0.987069	ND	28335290
Q8BHN3	Neutral alpha-glucosidase AB	Ganab	Mus musculus	107 kDa	14	14	0.983153	ND	41133290
P97310	DNA replication licensing factor MCM2	Mcm2	Mus musculus	102 kDa	14	14	0.985881	ND	30407470
Q01405	Protein transport protein Sec23A	Sec23a	Mus musculus	86 kDa	13	11	0.984342	ND	43816560
Q8R1F1	Protein Niban 2	Niban2	Mus musculus	85 kDa	13	13	0.986006	ND	36856530
Q8K1M6	Dynamin-1-like protein	Dnm1l	Mus musculus	83 kDa	13	13	0.984649	ND	19982780
Q3THK7	GMP synthase [glutamine-hydrolyzing]	Gmps	Mus musculus	77 kDa	13	13	0.982209	ND	28328920
Q3UDE2	Tubulin--tyrosine ligase-like protein 12	Ttll12	Mus musculus	74 kDa	13	13	0.985714	ND	24171180
P08003	Protein disulfide-isomerase A4	Pdia4	Mus musculus	72 kDa	13	11	0.98595	ND	58240350
Q501J6	Probable ATP-dependent RNA helicase DDX17	Ddx17	Mus musculus	72 kDa	13	7	0.985367	ND	17748810
P26043	Radixin	Rdx	Mus musculus	69 kDa	13	6	0.986603	ND	25186590
A2AUC9	Kelch-like protein 41	Klhl41	Mus musculus	68 kDa	13	13	0.986802	ND	85834230
Q9WUA2	Phenylalanine--tRNA ligase beta subunit	Farsb	Mus musculus	66 kDa	13	13	0.986279	ND	40926110
Q61024	Asparagine synthetase [glutamine-hydrolyzing]	Asns	Mus musculus	64 kDa	13	13	0.984885	ND	96023500
Q91V88	Nephronectin	Npnt	Mus musculus	61 kDa	13	13	0.987731	ND	60950860
Q9D0F9	Phosphoglucomutase-1	Pgm1	Mus musculus	61 kDa	13	13	0.985428	ND	26791010
P26638	Serine--tRNA ligase, cytoplasmic	Sars1	Mus musculus	58 kDa	13	13	0.98682	ND	114801100
Q61753	D-3-phosphoglycerate dehydrogenase	Phgdh	Mus musculus	57 kDa	13	13	0.986124	ND	136882500
Q1XH17	Tripartite motif-containing protein 72	Trim72	Mus musculus	53 kDa	13	13	0.985121	ND	46154100
P61979	Heterogeneous nuclear ribonucleoprotein K	Hnrnpk	Mus musculus	51 kDa	13	13	0.987496	ND	218594200
P21956	Lactadherin	Mfge8	Mus musculus	51 kDa	13	13	0.986968	ND	51410010
Q61398	Procollagen C-endopeptidase enhancer 1	Pcolce	Mus musculus	50 kDa	13	9	0.98594	ND	395134100
P62192	26S proteasome regulatory subunit 4	Psmc1	Mus musculus	49 kDa	13	13	0.985916	ND	43737010
P19324	Serpin H1	Serpinh1	Mus musculus	47 kDa	13	13	0.987001	ND	180654700
Q99JI4	26S proteasome non-ATPase regulatory subunit 6	Psmd6	Mus musculus	46 kDa	13	13	0.985962	ND	52953840
P63087	Serine/threonine-protein phosphatase PP1-gamma catalytic subunit	Ppp1cc	Mus musculus	37 kDa	13	2	0.981728	ND	4421793
Q62356	Follistatin-related protein 1	Fstl1	Mus musculus	35 kDa	13	6	0.987194	ND	68060670
Q3U962	Collagen alpha-2(V) chain	Col5a2	Mus musculus	145 kDa	13	13	0.986982	ND	61288540
P51432	1-phosphatidylinositol 4,5-bisphosphate phosphodiesterase beta-3	Plcb3	Mus musculus	139 kDa	13	13	0.982922	ND	19730790
Q8BHG1	Nardilysin	Nrdc	Mus musculus	133 kDa	13	13	0.98544	ND	18737030
Q9EPU0	Regulator of nonsense transcripts 1	Upf1	Mus musculus	124 kDa	13	13	0.985034	ND	13811630
Q920B9	FACT complex subunit SPT16	Supt16h	Mus musculus	120 kDa	13	13	0.98545	ND	30093600
Q9JHR7	Insulin-degrading enzyme	Ide	Mus musculus	118 kDa	13	6	0.983589	ND	9795592
P17427	AP-2 complex subunit alpha-2	Ap2a2	Mus musculus	104 kDa	13	11	0.98513	ND	14478270
Q80UM3	N-alpha-acetyltransferase 15, NatA auxiliary subunit	Naa15	Mus musculus	101 kDa	13	13	0.986886	ND	21542040
Q922D8	C-1-tetrahydrofolate synthase, cytoplasmic	Mthfd1	Mus musculus	101 kDa	13	13	0.98259	ND	25319730
Q8BJ71	Nuclear pore complex protein Nup93	Nup93	Mus musculus	93 kDa	12	12	0.983386	ND	15650190
Q9D4H8	Cullin-2	Cul2	Mus musculus	87 kDa	12	12	0.983375	ND	20336190
P33146	Cadherin-15	Cdh15	Mus musculus	86 kDa	12	12	0.985767	ND	129948600
Q9D662	Protein transport protein Sec23B	Sec23b	Mus musculus	86 kDa	12	10	0.981063	ND	25431170
Q9R0E1	Multifunctional procollagen lysine hydroxylase and glycosyltransferase LH3	Plod3	Mus musculus	85 kDa	12	11	0.98214	ND	14514380
Q62181	Semaphorin-3C	Sema3c	Mus musculus	85 kDa	12	12	0.980995	ND	17137740
P09405	Nucleolin	Ncl	Mus musculus	77 kDa	12	12	0.987483	ND	459415600
P24527	Leukotriene A-4 hydrolase	Lta4h	Mus musculus	69 kDa	12	8	0.985252	ND	24144950
P35235	Tyrosine-protein phosphatase non-receptor type 11	Ptpn11	Mus musculus	68 kDa	12	12	0.983849	ND	19181190
Q8QZY1	Eukaryotic translation initiation factor 3 subunit L	Eif3l	Mus musculus	67 kDa	12	12	0.987027	ND	40374640
P46061	Ran GTPase-activating protein 1	Rangap1	Mus musculus	64 kDa	12	12	0.986547	ND	29983810
Q9CWJ9	Bifunctional purine biosynthesis protein ATIC	Atic	Mus musculus	64 kDa	12	12	0.985632	ND	59548240
P28798	Progranulin	Grn	Mus musculus	63 kDa	12	12	0.984381	ND	83461540
Q62188	Dihydropyrimidinase-related protein 3	Dpysl3	Mus musculus	62 kDa	12	3	0.985993	ND	29265430
Q9CWK8	Sorting nexin-2	Snx2	Mus musculus	58 kDa	12	1	0.97765	ND	1555472
Q9CPY7	Cytosol aminopeptidase	Lap3	Mus musculus	56 kDa	12	12	0.98594	ND	72942530
Q61553	Fascin	Fscn1	Mus musculus	55 kDa	12	12	0.986961	ND	158359500
Q00493	Carboxypeptidase E	Cpe	Mus musculus	53 kDa	12	12	0.986223	ND	75789350
P60229	Eukaryotic translation initiation factor 3 subunit E	Eif3e	Mus musculus	52 kDa	12	12	0.986387	ND	59760000
Q9WTM5	RuvB-like 2	Ruvbl2	Mus musculus	51 kDa	12	12	0.986387	ND	54756510
Q9R118	Serine protease HTRA1	Htra1	Mus musculus	51 kDa	12	11	0.985814	ND	125928300
P46664	Adenylosuccinate synthetase isozyme 2	Adss2	Mus musculus	50 kDa	12	11	0.986864	ND	54120850
O88685	26S proteasome regulatory subunit 6A	Psmc3	Mus musculus	50 kDa	12	12	0.986072	ND	58432890
P60122	RuvB-like 1	Ruvbl1	Mus musculus	50 kDa	12	12	0.985249	ND	53617870
Q8VDW0	ATP-dependent RNA helicase DDX39A	Ddx39a	Mus musculus	49 kDa	12	6	0.983718	ND	26468600
P60843	Eukaryotic initiation factor 4A-I	Eif4a1	Mus musculus	46 kDa	12	6	0.986014	ND	105742100
Q60854	Serpin B6	Serpinb6	Mus musculus	43 kDa	12	11	0.986454	ND	120032000
O35887	Calumenin	Calu	Mus musculus	37 kDa	12	12	0.986249	ND	163268700
O35639	Annexin A3	Anxa3	Mus musculus	36 kDa	12	12	0.986366	ND	57189040
P08249	Malate dehydrogenase, mitochondrial	Mdh2	Mus musculus	36 kDa	12	5	0.985875	ND	76928440
P63101	14-3-3 protein zeta/delta	Ywhaz	Mus musculus	28 kDa	12	1	0.985599	ND	286488100
Q6A4J8	Ubiquitin carboxyl-terminal hydrolase 7	Usp7	Mus musculus	128 kDa	12	12	0.97808	ND	9654097
Q8BWZ3	N-alpha-acetyltransferase 25, NatB auxiliary subunit	Naa25	Mus musculus	112 kDa	12	12	0.986398	ND	14088280
P97449	Aminopeptidase N	Anpep	Mus musculus	110 kDa	12	12	0.983319	ND	13261640
Q9EPL2	Calsyntenin-1	Clstn1	Mus musculus	109 kDa	12	12	0.986409	ND	88920870
Q8BFY9	Transportin-1	Tnpo1	Mus musculus	102 kDa	12	9	0.976539	ND	12798670
Q9Z1X4	Interleukin enhancer-binding factor 3	Ilf3	Mus musculus	96 kDa	11	8	0.98408	ND	27408950
P25206	DNA replication licensing factor MCM3	Mcm3	Mus musculus	92 kDa	11	10	0.983517	ND	8723102
Q04750	DNA topoisomerase 1	Top1	Mus musculus	91 kDa	11	11	0.982721	ND	28322510
P13020	Gelsolin	Gsn	Mus musculus	86 kDa	11	6	0.986625	ND	49335450
Q62351	Transferrin receptor protein 1	Tfrc	Mus musculus	86 kDa	11	9	0.982232	ND	10749320
Q02248	Catenin beta-1	Ctnnb1	Mus musculus	85 kDa	11	9	0.984259	ND	18669390
Q9R0B9	Procollagen-lysine,2-oxoglutarate 5-dioxygenase 2	Plod2	Mus musculus	84 kDa	11	4	0.974137	ND	2562139
Q02257	Junction plakoglobin	Jup	Mus musculus	82 kDa	11	9	0.981875	ND	9783339
O08529	Calpain-2 catalytic subunit	Capn2	Mus musculus	80 kDa	11	11	0.987215	ND	90675400
Q8CIB5	Fermitin family homolog 2	Fermt2	Mus musculus	78 kDa	11	11	0.984967	ND	14697470
Q62095	ATP-dependent RNA helicase DDX3Y	Ddx3y	Mus musculus	73 kDa	11	1	0.940757	ND	739164
Q6P1B1	Xaa-Pro aminopeptidase 1	Xpnpep1	Mus musculus	70 kDa	11	11	0.986872	ND	31111840
P17879	Heat shock 70 kDa protein 1B	Hspa1b	Mus musculus	70 kDa	11	1	0.983306	ND	455160
Q99MN1	Lysine--tRNA ligase	Kars1	Mus musculus	68 kDa	11	11	0.986675	ND	77171490
P21619	Lamin-B2	Lmnb2	Mus musculus	67 kDa	11	11	0.986039	ND	39684540
Q80UG5	Septin-9	Septin9	Mus musculus	66 kDa	11	11	0.985887	ND	79195970
O70194	Eukaryotic translation initiation factor 3 subunit D	Eif3d	Mus musculus	64 kDa	11	11	0.984147	ND	38761650
P62814	V-type proton ATPase subunit B, brain isoform	Atp6v1b2	Mus musculus	57 kDa	11	11	0.985901	ND	42683310
P24547	Inosine-5'-monophosphate dehydrogenase 2	Impdh2	Mus musculus	56 kDa	11	11	0.98629	ND	37383670
Q99LF4	RNA-splicing ligase RtcB homolog	Rtcb	Mus musculus	55 kDa	11	11	0.985182	ND	24316740
P54822	Adenylosuccinate lyase	Adsl	Mus musculus	55 kDa	11	11	0.984874	ND	23525440
P28658	Ataxin-10	Atxn10	Mus musculus	54 kDa	11	11	0.98627	ND	29579750
Q9D1A2	Cytosolic non-specific dipeptidase	Cndp2	Mus musculus	53 kDa	11	11	0.985465	ND	13546670
Q9Z0N1	Eukaryotic translation initiation factor 2 subunit 3, X-linked	Eif2s3x	Mus musculus	51 kDa	11	11	0.98582	ND	100916100
Q91VI7	Ribonuclease inhibitor	Rnh1	Mus musculus	50 kDa	11	11	0.984463	ND	22964940
Q3USZ8	Divergent protein kinase domain 2A	Dipk2a	Mus musculus	49 kDa	11	11	0.985874	ND	21954790
P06869	Urokinase-type plasminogen activator	Plau	Mus musculus	48 kDa	11	11	0.985286	ND	41752930
P21550	Beta-enolase	Eno3	Mus musculus	47 kDa	11	7	0.985593	ND	128126000
P62196	26S proteasome regulatory subunit 8	Psmc5	Mus musculus	46 kDa	11	11	0.98728	ND	45562440
P10630	Eukaryotic initiation factor 4A-II	Eif4a2	Mus musculus	46 kDa	11	5	0.983646	ND	17322530
Q62465	Synaptic vesicle membrane protein VAT-1 homolog	Vat1	Mus musculus	43 kDa	11	11	0.98714	ND	149747200
Q99JX4	Eukaryotic translation initiation factor 3 subunit M	Eif3m	Mus musculus	43 kDa	11	11	0.986818	ND	39871380
Q9WVJ2	26S proteasome non-ATPase regulatory subunit 13	Psmd13	Mus musculus	43 kDa	11	11	0.986409	ND	35848970
Q9CR16	Peptidyl-prolyl cis-trans isomerase D	Ppid	Mus musculus	41 kDa	11	11	0.987174	ND	86987610
P63085	Mitogen-activated protein kinase 1	Mapk1	Mus musculus	41 kDa	11	7	0.984617	ND	20480960
Q9R1T2	SUMO-activating enzyme subunit 1	Sae1	Mus musculus	39 kDa	11	11	0.986968	ND	25810170
P10605	Cathepsin B	Ctsb	Mus musculus	37 kDa	11	11	0.986863	ND	244752500
Q6ZWX6	Eukaryotic translation initiation factor 2 subunit 1	Eif2s1	Mus musculus	36 kDa	11	11	0.985721	ND	101177500
P68040	Receptor of activated protein C kinase 1	Rack1	Mus musculus	35 kDa	11	11	0.987039	ND	474730300
P07214	SPARC	Sparc	Mus musculus	34 kDa	11	11	0.985835	ND	1064813000
Q9DB05	Alpha-soluble NSF attachment protein	Napa	Mus musculus	33 kDa	11	3	0.981507	ND	9192977
Q5SW19	Clustered mitochondria protein homolog	Cluh	Mus musculus	148 kDa	11	11	0.980493	ND	15138230
Q61543	Golgi apparatus protein 1	Glg1	Mus musculus	134 kDa	11	11	0.985423	ND	8438972
Q8CG48	Structural maintenance of chromosomes protein 2	Smc2	Mus musculus	134 kDa	11	11	0.972406	ND	9294080
Q9JKR6	Hypoxia up-regulated protein 1	Hyou1	Mus musculus	111 kDa	11	11	0.980189	ND	25340530
O08528	Hexokinase-2	Hk2	Mus musculus	103 kDa	11	9	0.968226	ND	6695188
Q3UYV9	Nuclear cap-binding protein subunit 1	Ncbp1	Mus musculus	92 kDa	10	10	0.98441	ND	11797830
Q9JLV5	Cullin-3	Cul3	Mus musculus	89 kDa	10	10	0.976889	ND	15129330
Q8VEK3	Heterogeneous nuclear ribonucleoprotein U	Hnrnpu	Mus musculus	88 kDa	10	10	0.984536	ND	41905040
P47857	ATP-dependent 6-phosphofructokinase, muscle type	Pfkm	Mus musculus	85 kDa	10	8	0.976455	ND	6208394
Q62177	Semaphorin-3B	Sema3b	Mus musculus	83 kDa	10	10	0.985759	ND	26526230
Q08879	Fibulin-1	Fbln1	Mus musculus	78 kDa	10	9	0.985424	ND	86206060
Q61584	Fragile X mental retardation syndrome-related protein 1	Fxr1	Mus musculus	76 kDa	10	9	0.982096	ND	13975600
P70698	CTP synthase 1	Ctps1	Mus musculus	67 kDa	10	9	0.983354	ND	13656890
P29416	Beta-hexosaminidase subunit alpha	Hexa	Mus musculus	61 kDa	10	10	0.985755	ND	41468350
P14685	26S proteasome non-ATPase regulatory subunit 3	Psmd3	Mus musculus	61 kDa	10	10	0.984673	ND	23106350
Q6DFW4	Nucleolar protein 58	Nop58	Mus musculus	60 kDa	10	10	0.984024	ND	11614410
Q61035	Histidine--tRNA ligase, cytoplasmic	Hars1	Mus musculus	57 kDa	10	10	0.98498	ND	32592010
Q91ZJ5	UTP--glucose-1-phosphate uridylyltransferase	Ugp2	Mus musculus	57 kDa	10	10	0.982666	ND	27219900
Q9JMA1	Ubiquitin carboxyl-terminal hydrolase 14	Usp14	Mus musculus	56 kDa	10	10	0.986375	ND	57191480
Q8BK67	Protein RCC2	Rcc2	Mus musculus	56 kDa	10	10	0.986215	ND	49590700
O70475	UDP-glucose 6-dehydrogenase	Ugdh	Mus musculus	55 kDa	10	10	0.985615	ND	26243430
P16675	Lysosomal protective protein	Ctsa	Mus musculus	54 kDa	10	10	0.985867	ND	44565740
P54823	Probable ATP-dependent RNA helicase DDX6	Ddx6	Mus musculus	54 kDa	10	10	0.98321	ND	35827450
P97855	Ras GTPase-activating protein-binding protein 1	G3bp1	Mus musculus	52 kDa	10	10	0.98647	ND	43612480
Q91YI0	Argininosuccinate lyase	Asl	Mus musculus	52 kDa	10	10	0.977409	ND	14002250
Q920A5	Retinoid-inducible serine carboxypeptidase	Scpep1	Mus musculus	51 kDa	10	10	0.985681	ND	33118490
P54071	Isocitrate dehydrogenase [NADP], mitochondrial	Idh2	Mus musculus	51 kDa	10	10	0.983339	ND	31661650
P14211	Calreticulin	Calr	Mus musculus	48 kDa	10	5	0.986431	ND	156064800
Q8BG32	26S proteasome non-ATPase regulatory subunit 11	Psmd11	Mus musculus	47 kDa	10	10	0.98486	ND	33405170
Q91W90	Thioredoxin domain-containing protein 5	Txndc5	Mus musculus	46 kDa	10	10	0.984939	ND	47859780
O88544	COP9 signalosome complex subunit 4	Cops4	Mus musculus	46 kDa	10	10	0.984878	ND	16917300
P62334	26S proteasome regulatory subunit 10B	Psmc6	Mus musculus	44 kDa	10	10	0.983321	ND	33404480
Q04447	Creatine kinase B-type	Ckb	Mus musculus	43 kDa	10	3	0.986018	ND	36126670
P07310	Creatine kinase M-type	Ckm	Mus musculus	43 kDa	10	4	0.983531	ND	31384870
P28653	Biglycan	Bgn	Mus musculus	42 kDa	10	2	0.984347	ND	131461100
Q91WK2	Eukaryotic translation initiation factor 3 subunit H	Eif3h	Mus musculus	40 kDa	10	10	0.985468	ND	22635560
O35685	Nuclear migration protein nudC	Nudc	Mus musculus	38 kDa	10	10	0.98711	ND	57265190
P48036	Annexin A5	Anxa5	Mus musculus	36 kDa	10	10	0.98726	ND	197582600
P16858	Glyceraldehyde-3-phosphate dehydrogenase	Gapdh	Mus musculus	36 kDa	10	6	0.985833	ND	447166100
Q9QZD9	Eukaryotic translation initiation factor 3 subunit I	Eif3i	Mus musculus	36 kDa	10	10	0.9843	ND	37681110
Q9CY64	Biliverdin reductase A	Blvra	Mus musculus	34 kDa	10	10	0.982827	ND	27462150
P14206	40S ribosomal protein SA	Rpsa	Mus musculus	33 kDa	10	10	0.987556	ND	221564900
O08709	Peroxiredoxin-6	Prdx6	Mus musculus	25 kDa	10	7	0.986899	ND	70441540
Q9CU62	Structural maintenance of chromosomes protein 1A	Smc1a	Mus musculus	143 kDa	10	10	0.979534	ND	7947306
Q8VDJ3	Vigilin	Hdlbp	Mus musculus	142 kDa	10	10	0.978568	ND	23926360
Q6PDG5	SWI/SNF complex subunit SMARCC2	Smarcc2	Mus musculus	133 kDa	10	5	0.97565	ND	4274587
Q8VI75	Importin-4	Ipo4	Mus musculus	119 kDa	10	10	0.98732	ND	13180600
P11103	Poly [ADP-ribose] polymerase 1	Parp1	Mus musculus	113 kDa	10	10	0.981552	ND	15743580
Q64737	Trifunctional purine biosynthetic protein adenosine-3	Gart	Mus musculus	108 kDa	10	10	0.985967	ND	21254000
Q810A7	ATP-dependent RNA helicase DDX42	Ddx42	Mus musculus	102 kDa	10	10	0.984029	ND	18209770
Q5SSL4	Active breakpoint cluster region-related protein	Abr	Mus musculus	98 kDa	9	9	0.974643	ND	7650728
P49717	DNA replication licensing factor MCM4	Mcm4	Mus musculus	97 kDa	9	9	0.974409	ND	11463420
Q61699	Heat shock protein 105 kDa	Hsph1	Mus musculus	96 kDa	9	9	0.976181	ND	12810820
Q8BH34	Semaphorin-3D	Sema3d	Mus musculus	90 kDa	9	9	0.984907	ND	16380110
P27612	Phospholipase A-2-activating protein	Plaa	Mus musculus	87 kDa	9	9	0.983589	ND	16344000
Q99MD9	Nuclear autoantigenic sperm protein	Nasp	Mus musculus	84 kDa	9	7	0.987877	ND	24837440
Q3V1G4	Olfactomedin-like protein 2B	Olfml2b	Mus musculus	84 kDa	9	9	0.987182	ND	98800050
Q91VR5	ATP-dependent RNA helicase DDX1	Ddx1	Mus musculus	83 kDa	9	9	0.986185	ND	10500550
Q8R146	Acylamino-acid-releasing enzyme	Apeh	Mus musculus	82 kDa	9	9	0.980804	ND	17604790
Q7TNG5	Echinoderm microtubule-associated protein-like 2	Eml2	Mus musculus	71 kDa	9	9	0.984135	ND	17512420
P17156	Heat shock-related 70 kDa protein 2	Hspa2	Mus musculus	70 kDa	9	2	0.959004	ND	2588069
Q91WJ8	Far upstream element-binding protein 1	Fubp1	Mus musculus	69 kDa	9	9	0.9845	ND	27289440
Q9JMH6	Thioredoxin reductase 1, cytoplasmic	Txnrd1	Mus musculus	67 kDa	9	6	0.987407	ND	59254560
P35564	Calnexin	Canx	Mus musculus	67 kDa	9	9	0.985888	ND	20439200
P61222	ATP-binding cassette sub-family E member 1	Abce1	Mus musculus	67 kDa	9	9	0.984702	ND	17305130
Q9Z0X1	Apoptosis-inducing factor 1, mitochondrial	Aifm1	Mus musculus	67 kDa	9	9	0.979879	ND	17100000
Q61576	Peptidyl-prolyl cis-trans isomerase FKBP10	Fkbp10	Mus musculus	65 kDa	9	9	0.983747	ND	45029910
O08539	Myc box-dependent-interacting protein 1	Bin1	Mus musculus	64 kDa	9	9	0.9866	ND	98311590
Q9D6Z1	Nucleolar protein 56	Nop56	Mus musculus	64 kDa	9	6	0.984768	ND	23276040
P80316	T-complex protein 1 subunit epsilon	Cct5	Mus musculus	60 kDa	9	9	0.986654	ND	65227000
Q9Z2L6	Multiple inositol polyphosphate phosphatase 1	Minpp1	Mus musculus	55 kDa	9	8	0.982355	ND	19511940
P55065	Phospholipid transfer protein	Pltp	Mus musculus	54 kDa	9	9	0.986172	ND	93373150
Q99LD4	COP9 signalosome complex subunit 1	Gps1	Mus musculus	53 kDa	9	9	0.981996	ND	21018990
Q8BM72	Heat shock 70 kDa protein 13	Hspa13	Mus musculus	52 kDa	9	5	0.985704	ND	23479010
P61202	COP9 signalosome complex subunit 2	Cops2	Mus musculus	52 kDa	9	9	0.984983	ND	20370060
Q9CXD9	Leucine-rich repeat-containing protein 17	Lrrc17	Mus musculus	52 kDa	9	9	0.983741	ND	33616030
Q9R0X4	Acyl-coenzyme A thioesterase 9, mitochondrial	Acot9	Mus musculus	51 kDa	9	9	0.985287	ND	13096840
Q9D8N0	Elongation factor 1-gamma	Eef1g	Mus musculus	50 kDa	9	4	0.985164	ND	43140560
P46471	26S proteasome regulatory subunit 7	Psmc2	Mus musculus	49 kDa	9	9	0.985673	ND	46731990
O89017	Legumain	Lgmn	Mus musculus	49 kDa	9	9	0.985248	ND	21529360
O09161	Calsequestrin-2	Casq2	Mus musculus	48 kDa	9	6	0.987425	ND	393221200
P32067	Lupus La protein homolog	Ssb	Mus musculus	48 kDa	9	9	0.986854	ND	44876110
Q922R8	Protein disulfide-isomerase A6	Pdia6	Mus musculus	48 kDa	9	3	0.986346	ND	40386700
Q60973	Histone-binding protein RBBP7	Rbbp7	Mus musculus	48 kDa	9	7	0.984825	ND	26487090
O88543	COP9 signalosome complex subunit 3	Cops3	Mus musculus	48 kDa	9	9	0.981144	ND	9608013
O88844	Isocitrate dehydrogenase [NADP] cytoplasmic	Idh1	Mus musculus	47 kDa	9	3	0.983	ND	17375330
Q9WV54	Acid ceramidase	Asah1	Mus musculus	45 kDa	9	9	0.987127	ND	76815090
P61161	Actin-related protein 2	Actr2	Mus musculus	45 kDa	9	9	0.986421	ND	113554300
P50580	Proliferation-associated protein 2G4	Pa2g4	Mus musculus	44 kDa	9	9	0.986662	ND	98858320
P70318	Nucleolysin TIAR	Tial1	Mus musculus	43 kDa	9	5	0.986831	ND	7649653
Q61112	45 kDa calcium-binding protein	Sdf4	Mus musculus	42 kDa	9	9	0.986252	ND	22832370
P32233	Developmentally-regulated GTP-binding protein 1	Drg1	Mus musculus	41 kDa	9	9	0.986498	ND	17168150
Q3UM45	Protein phosphatase 1 regulatory subunit 7	Ppp1r7	Mus musculus	41 kDa	9	9	0.98621	ND	25235580
Q99L45	Eukaryotic translation initiation factor 2 subunit 2	Eif2s2	Mus musculus	38 kDa	9	9	0.985165	ND	53724770
Q8BK64	Activator of 90 kDa heat shock protein ATPase homolog 1	Ahsa1	Mus musculus	38 kDa	9	9	0.984561	ND	35946800
Q9Z1Z2	Serine-threonine kinase receptor-associated protein	Strap	Mus musculus	38 kDa	9	9	0.983411	ND	31843640
P26516	26S proteasome non-ATPase regulatory subunit 7	Psmd7	Mus musculus	37 kDa	9	9	0.983209	ND	43412160
P97429	Annexin A4	Anxa4	Mus musculus	36 kDa	9	8	0.987017	ND	40254690
P10518	Delta-aminolevulinic acid dehydratase	Alad	Mus musculus	36 kDa	9	9	0.986189	ND	65634040
P47199	Quinone oxidoreductase	Cryz	Mus musculus	35 kDa	9	9	0.979794	ND	10902860
P47962	60S ribosomal protein L5	Rpl5	Mus musculus	34 kDa	9	9	0.985831	ND	78548910
P58774	Tropomyosin beta chain	Tpm2	Mus musculus	33 kDa	9	1	0.985583	ND	35729320
P47877	Insulin-like growth factor-binding protein 2	Igfbp2	Mus musculus	33 kDa	9	6	0.985199	ND	736206500
P58771	Tropomyosin alpha-1 chain	Tpm1	Mus musculus	33 kDa	9	1	0.983646	ND	101861700
P47757	F-actin-capping protein subunit beta	Capzb	Mus musculus	31 kDa	9	9	0.987253	ND	120512700
Q9CQ65	S-methyl-5'-thioadenosine phosphorylase	Mtap	Mus musculus	31 kDa	9	9	0.984189	ND	24061640
Q07079	Insulin-like growth factor-binding protein 5	Igfbp5	Mus musculus	30 kDa	9	9	0.987521	ND	1237009000
Q9QYB1	Chloride intracellular channel protein 4	Clic4	Mus musculus	29 kDa	9	8	0.986117	ND	39145980
Q61581	Insulin-like growth factor-binding protein 7	Igfbp7	Mus musculus	29 kDa	9	5	0.98564	ND	62272220
P97372	Proteasome activator complex subunit 2	Psme2	Mus musculus	27 kDa	9	9	0.985162	ND	29446890
P51859	Hepatoma-derived growth factor	Hdgf	Mus musculus	26 kDa	9	9	0.985176	ND	125795900
P18760	Cofilin-1	Cfl1	Mus musculus	19 kDa	9	3	0.985898	ND	122930500
Q9CW03	Structural maintenance of chromosomes protein 3	Smc3	Mus musculus	142 kDa	9	9	0.977324	ND	6285783
Q6P549	Phosphatidylinositol 3,4,5-trisphosphate 5-phosphatase 2	Inppl1	Mus musculus	139 kDa	9	9	0.979033	ND	6748273
O54774	AP-3 complex subunit delta-1	Ap3d1	Mus musculus	135 kDa	9	4	0.979589	ND	3224553
Q8CGF7	Transcription elongation regulator 1	Tcerg1	Mus musculus	124 kDa	9	9	0.984873	ND	13778260
P27546	Microtubule-associated protein 4	Map4	Mus musculus	117 kDa	9	9	0.985499	ND	7628341
Q91YE6	Importin-9	Ipo9	Mus musculus	116 kDa	9	9	0.984072	ND	15484340
Q60875	Rho guanine nucleotide exchange factor 2	Arhgef2	Mus musculus	112 kDa	9	9	0.980452	ND	9357697
Q8R429	Sarcoplasmic/endoplasmic reticulum calcium ATPase 1	Atp2a1	Mus musculus	109 kDa	9	9	0.981622	ND	12312800
Q8C8U0	Liprin-beta-1	Ppfibp1	Mus musculus	109 kDa	9	9	0.979366	ND	9589243
Q9CSH3	Exosome complex exonuclease RRP44	Dis3	Mus musculus	109 kDa	9	9	0.945697	ND	6406349
O08759	Ubiquitin-protein ligase E3A	Ube3a	Mus musculus	100 kDa	9	9	0.97972	ND	9461142
P28271	Cytoplasmic aconitate hydratase	Aco1	Mus musculus	98 kDa	8	8	0.985099	ND	11124850
Q6P542	ATP-binding cassette sub-family F member 1	Abcf1	Mus musculus	95 kDa	8	8	0.983119	ND	12556520
Q9D5V5	Cullin-5	Cul5	Mus musculus	91 kDa	8	8	0.977992	ND	5631687
Q9WTX6	Cullin-1	Cul1	Mus musculus	90 kDa	8	8	0.984708	ND	14429230
Q9ERG2	Striatin-3	Strn3	Mus musculus	87 kDa	8	8	0.982061	ND	11290870
Q9Z175	Lysyl oxidase homolog 3	Loxl3	Mus musculus	84 kDa	8	8	0.981493	ND	16314100
P49718	DNA replication licensing factor MCM5	Mcm5	Mus musculus	82 kDa	8	7	0.981586	ND	6091553
P51660	Peroxisomal multifunctional enzyme type 2	Hsd17b4	Mus musculus	79 kDa	8	8	0.981703	ND	16918290
Q9D0E1	Heterogeneous nuclear ribonucleoprotein M	Hnrnpm	Mus musculus	78 kDa	8	8	0.97941	ND	24240280
Q8VCT3	Aminopeptidase B	Rnpep	Mus musculus	72 kDa	8	8	0.984213	ND	15661910
P50516	V-type proton ATPase catalytic subunit A	Atp6v1a	Mus musculus	68 kDa	8	8	0.984811	ND	38438030
Q6PB93	Polypeptide N-acetylgalactosaminyltransferase 2	Galnt2	Mus musculus	65 kDa	8	4	0.974976	ND	2526935
O35841	Apoptosis inhibitor 5	Api5	Mus musculus	57 kDa	8	8	0.987091	ND	38137330
P47738	Aldehyde dehydrogenase, mitochondrial	Aldh2	Mus musculus	57 kDa	8	8	0.985802	ND	9724790
O70310	Glycylpeptide N-tetradecanoyltransferase 1	Nmt1	Mus musculus	57 kDa	8	7	0.979345	ND	7000176
Q8BJY1	26S proteasome non-ATPase regulatory subunit 5	Psmd5	Mus musculus	56 kDa	8	8	0.985962	ND	16852510
Q9WVE8	Protein kinase C and casein kinase substrate in neurons protein 2	Pacsin2	Mus musculus	56 kDa	8	8	0.984563	ND	21376420
Q99KP6	Pre-mRNA-processing factor 19	Prpf19	Mus musculus	55 kDa	8	8	0.982366	ND	56747940
Q99KQ4	Nicotinamide phosphoribosyltransferase	Nampt	Mus musculus	55 kDa	8	8	0.969549	ND	13814650
P97807	Fumarate hydratase, mitochondrial	Fh	Mus musculus	54 kDa	8	8	0.983377	ND	36810670
P32921	Tryptophan--tRNA ligase, cytoplasmic	Wars1	Mus musculus	54 kDa	8	8	0.983134	ND	19351900
P50431	Serine hydroxymethyltransferase, cytosolic	Shmt1	Mus musculus	53 kDa	8	8	0.980184	ND	6153958
Q9CZU6	Citrate synthase, mitochondrial	Cs	Mus musculus	52 kDa	8	8	0.987095	ND	38614890
Q8C878	NEDD8-activating enzyme E1 catalytic subunit	Uba3	Mus musculus	52 kDa	8	8	0.98164	ND	15960970
P84091	AP-2 complex subunit mu	Ap2m1	Mus musculus	50 kDa	8	8	0.986521	ND	21880580
P28650	Adenylosuccinate synthetase isozyme 1	Adss1	Mus musculus	50 kDa	8	4	0.984895	ND	7871018
P35585	AP-1 complex subunit mu-1	Ap1m1	Mus musculus	49 kDa	8	8	0.981842	ND	22450070
Q60972	Histone-binding protein RBBP4	Rbbp4	Mus musculus	48 kDa	8	6	0.986232	ND	48186690
O88968	Transcobalamin-2	Tcn2	Mus musculus	48 kDa	8	8	0.985446	ND	35622860
Q9D964	Glycine amidinotransferase, mitochondrial	Gatm	Mus musculus	48 kDa	8	8	0.985117	ND	12736650
Q9DCL9	Multifunctional protein ADE2	Paics	Mus musculus	47 kDa	8	8	0.985396	ND	28207930
Q9Z2N8	Actin-like protein 6A	Actl6a	Mus musculus	47 kDa	8	8	0.984806	ND	33750500
Q6GU68	Immunoglobulin superfamily containing leucine-rich repeat protein	Islr	Mus musculus	46 kDa	8	6	0.987061	ND	101197300
P31324	cAMP-dependent protein kinase type II-beta regulatory subunit	Prkar2b	Mus musculus	46 kDa	8	2	0.977985	ND	746106
P22777	Plasminogen activator inhibitor 1	Serpine1	Mus musculus	45 kDa	8	7	0.985008	ND	16837420
P61164	Alpha-centractin	Actr1a	Mus musculus	43 kDa	8	3	0.986873	ND	15209760
Q9D6X6	Serine protease 23	Prss23	Mus musculus	43 kDa	8	8	0.985556	ND	27582810
Q9CXY6	Interleukin enhancer-binding factor 2	Ilf2	Mus musculus	43 kDa	8	8	0.984932	ND	72558640
Q63844	Mitogen-activated protein kinase 3	Mapk3	Mus musculus	43 kDa	8	4	0.981851	ND	6026214
P70460	Vasodilator-stimulated phosphoprotein	Vasp	Mus musculus	40 kDa	8	3	0.980686	ND	11241390
Q9CQT1	Methylthioribose-1-phosphate isomerase	Mri1	Mus musculus	39 kDa	8	8	0.984185	ND	11538690
O35864	COP9 signalosome complex subunit 5	Cops5	Mus musculus	38 kDa	8	8	0.986435	ND	22328370
Q9DCH4	Eukaryotic translation initiation factor 3 subunit F	Eif3f	Mus musculus	38 kDa	8	8	0.986143	ND	57875730
P70372	ELAV-like protein 1	Elavl1	Mus musculus	36 kDa	8	8	0.987359	ND	43689210
P45376	Aldo-keto reductase family 1 member B1	Akr1b1	Mus musculus	36 kDa	8	8	0.98667	ND	82150260
Q9DAW9	Calponin-3	Cnn3	Mus musculus	36 kDa	8	7	0.98547	ND	46392180
P28352	DNA-(apurinic or apyrimidinic site) endonuclease	Apex1	Mus musculus	35 kDa	8	8	0.986143	ND	52651670
P10711	Transcription elongation factor A protein 1	Tcea1	Mus musculus	34 kDa	8	8	0.986633	ND	39447830
Q62000	Mimecan	Ogn	Mus musculus	34 kDa	8	5	0.986405	ND	95969640
P47911	60S ribosomal protein L6	Rpl6	Mus musculus	34 kDa	8	8	0.983789	ND	88827580
P47754	F-actin-capping protein subunit alpha-2	Capza2	Mus musculus	33 kDa	8	6	0.985874	ND	22629670
Q9QZE7	Translin-associated protein X	Tsnax	Mus musculus	33 kDa	8	8	0.983963	ND	27851860
P47753	F-actin-capping protein subunit alpha-1	Capza1	Mus musculus	33 kDa	8	6	0.982965	ND	58380240
P57776	Elongation factor 1-delta	Eef1d	Mus musculus	31 kDa	8	3	0.987494	ND	28689200
P26645	Myristoylated alanine-rich C-kinase substrate	Marcks	Mus musculus	30 kDa	8	8	0.987252	ND	38399270
O55234	Proteasome subunit beta type-5	Psmb5	Mus musculus	29 kDa	8	8	0.986505	ND	149419400
Q6IRU2	Tropomyosin alpha-4 chain	Tpm4	Mus musculus	28 kDa	8	7	0.986804	ND	418527600
Q9CQE8	RNA transcription, translation and transport factor protein	RTRAF	Mus musculus	28 kDa	8	8	0.985728	ND	16130520
Q9D0I8	mRNA turnover protein 4 homolog	Mrto4	Mus musculus	28 kDa	8	8	0.982563	ND	15874600
P62908	40S ribosomal protein S3	Rps3	Mus musculus	27 kDa	8	8	0.987098	ND	297686900
Q9CXW3	Calcyclin-binding protein	Cacybp	Mus musculus	27 kDa	8	5	0.984961	ND	32388420
P37804	Transgelin	Tagln	Mus musculus	23 kDa	8	8	0.98628	ND	44929360
Q9WVA4	Transgelin-2	Tagln2	Mus musculus	22 kDa	8	3	0.984659	ND	102813800
P45591	Cofilin-2	Cfl2	Mus musculus	19 kDa	8	6	0.985864	ND	48225650
Q8BV57	Soluble scavenger receptor cysteine-rich domain-containing protein SSC5D	Ssc5d	Mus musculus	145 kDa	8	8	0.984277	ND	10481800
Q32MD9	Cell adhesion molecule-related/down-regulated by oncogenes	Cdon	Mus musculus	135 kDa	8	8	0.985163	ND	22556960
Q03350	Thrombospondin-2	Thbs2	Mus musculus	130 kDa	8	8	0.985552	ND	7983408
Q61738	Integrin alpha-7	Itga7	Mus musculus	129 kDa	8	8	0.987063	ND	38559900
P97496	SWI/SNF complex subunit SMARCC1	Smarcc1	Mus musculus	123 kDa	8	3	0.975595	ND	5106409
Q9WTI7	Unconventional myosin-Ic	Myo1c	Mus musculus	122 kDa	8	8	0.983034	ND	7957862
Q9Z1R2	Large proline-rich protein BAG6	Bag6	Mus musculus	121 kDa	8	8	0.985837	ND	11157760
Q569Z5	Probable ATP-dependent RNA helicase DDX46	Ddx46	Mus musculus	117 kDa	8	8	0.981735	ND	8898738
Q8VDP3	[F-actin]-monooxygenase MICAL1	Mical1	Mus musculus	117 kDa	8	8	0.980656	ND	9901964
P11688	Integrin alpha-5	Itga5	Mus musculus	115 kDa	8	8	0.985662	ND	22412190
O09159	Lysosomal alpha-mannosidase	Man2b1	Mus musculus	115 kDa	8	8	0.978584	ND	9604775
Q6NZC7	SEC23-interacting protein	Sec23ip	Mus musculus	111 kDa	8	8	0.978449	ND	9785659
O35375	Neuropilin-2	Nrp2	Mus musculus	105 kDa	8	3	0.936644	ND	3138066
Q9QXK3	Coatomer subunit gamma-2	Copg2	Mus musculus	98 kDa	7	2	0.934198	ND	2027470
P48722	Heat shock 70 kDa protein 4L	Hspa4l	Mus musculus	94 kDa	7	6	0.984417	ND	8985204
Q921C5	Protein bicaudal D homolog 2	Bicd2	Mus musculus	93 kDa	7	7	0.982072	ND	7571898
Q8K4Z5	Splicing factor 3A subunit 1	Sf3a1	Mus musculus	89 kDa	7	7	0.986374	ND	18434490
P12382	ATP-dependent 6-phosphofructokinase, liver type	Pfkl	Mus musculus	85 kDa	7	5	0.964147	ND	2993870
Q8CAQ8	MICOS complex subunit Mic60	Immt	Mus musculus	84 kDa	7	7	0.979695	ND	5240615
Q99KK7	Dipeptidyl peptidase 3	Dpp3	Mus musculus	83 kDa	7	5	0.98155	ND	12189520
Q08943	FACT complex subunit SSRP1	Ssrp1	Mus musculus	81 kDa	7	7	0.986324	ND	27877040
P29533	Vascular cell adhesion protein 1	Vcam1	Mus musculus	81 kDa	7	7	0.982102	ND	7258366
Q3U0V1	Far upstream element-binding protein 2	Khsrp	Mus musculus	77 kDa	7	7	0.986617	ND	28038140
Q9CXF4	TBC1 domain family member 15	Tbc1d15	Mus musculus	77 kDa	7	7	0.973292	ND	4568918
P23780	Beta-galactosidase	Glb1	Mus musculus	73 kDa	7	6	0.985406	ND	11460430
Q8CIG8	Protein arginine N-methyltransferase 5	Prmt5	Mus musculus	73 kDa	7	7	0.978577	ND	12801820
Q9Z1F9	SUMO-activating enzyme subunit 2	Uba2	Mus musculus	71 kDa	7	7	0.986252	ND	26994300
Q61468	Mesothelin	Msln	Mus musculus	69 kDa	7	7	0.983875	ND	29589790
P40142	Transketolase	Tkt	Mus musculus	68 kDa	7	6	0.986643	ND	32982670
Q6PIP5	NudC domain-containing protein 1	Nudcd1	Mus musculus	67 kDa	7	4	0.986056	ND	4176293
O88448	Kinesin light chain 2	Klc2	Mus musculus	67 kDa	7	3	0.940388	ND	3899318
Q8R366	Immunoglobulin superfamily member 8	Igsf8	Mus musculus	65 kDa	7	7	0.984988	ND	16629440
Q3V1L4	Cytosolic purine 5'-nucleotidase	Nt5c2	Mus musculus	65 kDa	7	7	0.981764	ND	5406282
Q9CWL8	Beta-catenin-like protein 1	Ctnnbl1	Mus musculus	65 kDa	7	7	0.981265	ND	6615626
Q8R081	Heterogeneous nuclear ribonucleoprotein L	Hnrnpl	Mus musculus	64 kDa	7	7	0.985846	ND	27596870
Q921F4	Heterogeneous nuclear ribonucleoprotein L-like	Hnrnpll	Mus musculus	64 kDa	7	7	0.981835	ND	8704150
P06745	Glucose-6-phosphate isomerase	Gpi	Mus musculus	63 kDa	7	7	0.975196	ND	7445860
O88643	Serine/threonine-protein kinase PAK 1	Pak1	Mus musculus	61 kDa	7	6	0.98406	ND	14739730
Q8BH64	EH domain-containing protein 2	Ehd2	Mus musculus	61 kDa	7	5	0.976638	ND	7682555
Q3UEB3	Poly(U)-binding-splicing factor PUF60	Puf60	Mus musculus	60 kDa	7	1	0.934659	ND	553990
O08538	Angiopoietin-1	Angpt1	Mus musculus	58 kDa	7	2	0.98516	ND	13108770
P10852	4F2 cell-surface antigen heavy chain	Slc3a2	Mus musculus	58 kDa	7	7	0.984348	ND	20602840
Q8JZK9	Hydroxymethylglutaryl-CoA synthase, cytoplasmic	Hmgcs1	Mus musculus	58 kDa	7	7	0.981253	ND	7275984
Q8R1Q8	Cytoplasmic dynein 1 light intermediate chain 1	Dync1li1	Mus musculus	57 kDa	7	6	0.987263	ND	25349470
Q3TW96	UDP-N-acetylhexosamine pyrophosphorylase-like protein 1	Uap1l1	Mus musculus	57 kDa	7	6	0.985522	ND	11946130
P14576	Signal recognition particle 54 kDa protein	Srp54	Mus musculus	56 kDa	7	7	0.983479	ND	7934820
P17225	Polypyrimidine tract-binding protein 1	Ptbp1	Mus musculus	56 kDa	7	5	0.97884	ND	13436000
Q9D0K2	Succinyl-CoA:3-ketoacid coenzyme A transferase 1, mitochondrial	Oxct1	Mus musculus	56 kDa	7	7	0.974878	ND	9701861
Q7TQ48	Sarcalumenin	Srl	Mus musculus	54 kDa	7	7	0.985649	ND	15195930
Q6PDL0	Cytoplasmic dynein 1 light intermediate chain 2	Dync1li2	Mus musculus	54 kDa	7	2	0.970141	ND	1509735
P97379	Ras GTPase-activating protein-binding protein 2	G3bp2	Mus musculus	54 kDa	7	7	0.960412	ND	10017120
O08663	Methionine aminopeptidase 2	Metap2	Mus musculus	53 kDa	7	7	0.983443	ND	11014420
Q9Z2W0	Aspartyl aminopeptidase	Dnpep	Mus musculus	52 kDa	7	7	0.986848	ND	52206930
Q07076	Annexin A7	Anxa7	Mus musculus	50 kDa	7	7	0.985539	ND	10130570
Q8BIW1	Exopolyphosphatase PRUNE1	Prune1	Mus musculus	50 kDa	7	7	0.979107	ND	7709654
Q91VC3	Eukaryotic initiation factor 4A-III	Eif4a3	Mus musculus	47 kDa	7	6	0.986935	ND	12401070
Q9D8U8	Sorting nexin-5	Snx5	Mus musculus	47 kDa	7	7	0.98479	ND	10495480
P18242	Cathepsin D	Ctsd	Mus musculus	45 kDa	7	5	0.980541	ND	142787400
Q9CZ30	Obg-like ATPase 1	Ola1	Mus musculus	45 kDa	7	1	0.977698	ND	5069394
P63037	DnaJ homolog subfamily A member 1	Dnaja1	Mus musculus	45 kDa	7	1	0.975434	ND	1948248
Q9CY58	Plasminogen activator inhibitor 1 RNA-binding protein	Serbp1	Mus musculus	45 kDa	7	2	0.975213	ND	217029
Q9JK81	MYG1 exonuclease	Myg1	Mus musculus	43 kDa	7	7	0.983132	ND	8514059
Q8R5C5	Beta-centractin	Actr1b	Mus musculus	42 kDa	7	2	0.986924	ND	6433670
Q99L47	Hsc70-interacting protein	St13	Mus musculus	42 kDa	7	7	0.985957	ND	114816000
Q9WV32	Actin-related protein 2/3 complex subunit 1B	Arpc1b	Mus musculus	41 kDa	7	7	0.986326	ND	28361160
Q06138	Calcium-binding protein 39	Cab39	Mus musculus	40 kDa	7	6	0.982886	ND	23362420
Q9D6R2	Isocitrate dehydrogenase [NAD] subunit alpha, mitochondrial	Idh3a	Mus musculus	40 kDa	7	7	0.981293	ND	7678608
Q9CYN9	Renin receptor	Atp6ap2	Mus musculus	39 kDa	7	4	0.986798	ND	14163260
P40336	Vacuolar protein sorting-associated protein 26A	Vps26a	Mus musculus	38 kDa	7	7	0.986763	ND	33926910
Q921M7	CYFIP-related Rac1 interactor B	Cyrib	Mus musculus	37 kDa	7	7	0.986401	ND	13238090
O89079	Coatomer subunit epsilon	Cope	Mus musculus	35 kDa	7	7	0.986323	ND	24370570
P14869	60S acidic ribosomal protein P0	Rplp0	Mus musculus	34 kDa	7	7	0.987085	ND	229807600
P31230	Aminoacyl tRNA synthase complex-interacting multifunctional protein 1	Aimp1	Mus musculus	34 kDa	7	5	0.983257	ND	25526540
Q8BJU0	Small glutamine-rich tetratricopeptide repeat-containing protein alpha	Sgta	Mus musculus	34 kDa	7	7	0.981592	ND	19817810
O88958	Glucosamine-6-phosphate isomerase 1	Gnpda1	Mus musculus	33 kDa	7	7	0.986993	ND	26961090
Q08093	Calponin-2	Cnn2	Mus musculus	33 kDa	7	1	0.980491	ND	5201840
Q60932	Voltage-dependent anion-selective channel protein 1	Vdac1	Mus musculus	32 kDa	7	7	0.987498	ND	36653020
Q8CDN6	Thioredoxin-like protein 1	Txnl1	Mus musculus	32 kDa	7	7	0.986875	ND	57822120
P23492	Purine nucleoside phosphorylase	Pnp	Mus musculus	32 kDa	7	7	0.984498	ND	37416270
Q01730	Ras suppressor protein 1	Rsu1	Mus musculus	32 kDa	7	2	0.981122	ND	3102948
P70677	Caspase-3	Casp3	Mus musculus	31 kDa	7	7	0.987389	ND	38967240
P25444	40S ribosomal protein S2	Rps2	Mus musculus	31 kDa	7	7	0.984744	ND	31155390
P61290	Proteasome activator complex subunit 3	Psme3	Mus musculus	30 kDa	7	7	0.98695	ND	23782700
Q9CZ04	COP9 signalosome complex subunit 7a	Cops7a	Mus musculus	30 kDa	7	7	0.985343	ND	8269432
Q9R1P4	Proteasome subunit alpha type-1	Psma1	Mus musculus	30 kDa	7	7	0.982769	ND	84418450
P17751	Triosephosphate isomerase	Tpi1	Mus musculus	27 kDa	7	3	0.986248	ND	3917960
Q9Z1Q5	Chloride intracellular channel protein 1	Clic1	Mus musculus	27 kDa	7	2	0.984727	ND	86567250
Q62348	Translin	Tsn	Mus musculus	26 kDa	7	7	0.986993	ND	53063840
P10649	Glutathione S-transferase Mu 1	Gstm1	Mus musculus	26 kDa	7	6	0.983617	ND	14779980
Q62446	Peptidyl-prolyl cis-trans isomerase FKBP3	Fkbp3	Mus musculus	25 kDa	7	7	0.987477	ND	91478390
Q91V41	Ras-related protein Rab-14	Rab14	Mus musculus	24 kDa	7	6	0.987503	ND	20360580
P29391	Ferritin light chain 1	Ftl1	Mus musculus	21 kDa	7	7	0.986671	ND	45772990
P97315	Cysteine and glycine-rich protein 1	Csrp1	Mus musculus	21 kDa	7	7	0.985974	ND	47685640
P97457	Myosin regulatory light chain 2, skeletal muscle isoform	Mylpf	Mus musculus	19 kDa	7	7	0.985273	ND	31983830
P61327	Protein mago nashi homolog	Magoh	Mus musculus	17 kDa	7	7	0.986023	ND	34209990
P15532	Nucleoside diphosphate kinase A	Nme1	Mus musculus	17 kDa	7	4	0.985753	ND	68064630
O35638	Cohesin subunit SA-2	Stag2	Mus musculus	141 kDa	7	7	0.939095	ND	3537485
P11087	Collagen alpha-1(I) chain	Col1a1	Mus musculus	138 kDa	7	4	0.98447	ND	9596722
Q8BYA0	Tubulin-specific chaperone D	Tbcd	Mus musculus	133 kDa	7	7	0.980919	ND	5581272
Q9CZU3	Exosome RNA helicase MTR4	Mtrex	Mus musculus	118 kDa	7	7	0.981489	ND	6936955
Q8VDN2	Sodium/potassium-transporting ATPase subunit alpha-1	Atp1a1	Mus musculus	113 kDa	7	7	0.985593	ND	18680850
Q9DBR1	5'-3' exoribonuclease 2	Xrn2	Mus musculus	109 kDa	7	7	0.978916	ND	9402219
P70699	Lysosomal alpha-glucosidase	Gaa	Mus musculus	106 kDa	7	7	0.981634	ND	18542590
Q62448	Eukaryotic translation initiation factor 4 gamma 2	Eif4g2	Mus musculus	102 kDa	7	7	0.984571	ND	15912240
Q68FL6	Methionine--tRNA ligase, cytoplasmic	Mars1	Mus musculus	101 kDa	7	7	0.984198	ND	9471837
Q62165	Dystroglycan	Dag1	Mus musculus	97 kDa	6	6	0.986719	ND	28597960
Q8BZ98	Dynamin-3	Dnm3	Mus musculus	97 kDa	6	1	0.982133	ND	1128468
Q9ES28	Rho guanine nucleotide exchange factor 7	Arhgef7	Mus musculus	97 kDa	6	6	0.962081	ND	2808528
Q8K310	Matrin-3	Matr3	Mus musculus	95 kDa	6	6	0.980252	ND	10894340
P35951	Low-density lipoprotein receptor	Ldlr	Mus musculus	95 kDa	6	6	0.977478	ND	9059012
Q6P2K6	Serine/threonine-protein phosphatase 4 regulatory subunit 3A	Ppp4r3a	Mus musculus	94 kDa	6	5	0.977132	ND	9416579
Q9JIK5	Nucleolar RNA helicase 2	Ddx21	Mus musculus	94 kDa	6	6	0.961724	ND	6888895
Q80Y81	Zinc phosphodiesterase ELAC protein 2	Elac2	Mus musculus	93 kDa	6	6	0.967123	ND	2415508
Q61220	Protein kinase C-binding protein NELL2	Nell2	Mus musculus	91 kDa	6	1	0.977037	ND	11629710
Q8BNJ2	A disintegrin and metalloproteinase with thrombospondin motifs 4	Adamts4	Mus musculus	90 kDa	6	6	0.967893	ND	5152987
Q62318	Transcription intermediary factor 1-beta	Trim28	Mus musculus	89 kDa	6	6	0.984564	ND	29700620
Q99KC8	von Willebrand factor A domain-containing protein 5A	Vwa5a	Mus musculus	87 kDa	6	6	0.981654	ND	8762709
Q571I9	Aldehyde dehydrogenase family 16 member A1	Aldh16a1	Mus musculus	85 kDa	6	6	0.986611	ND	6917203
Q9WUA3	ATP-dependent 6-phosphofructokinase, platelet type	Pfkp	Mus musculus	85 kDa	6	4	0.982311	ND	4363183
Q61183	Poly(A) polymerase alpha	Papola	Mus musculus	82 kDa	6	6	0.976092	ND	4923253
P98064	Mannan-binding lectin serine protease 1	Masp1	Mus musculus	80 kDa	6	5	0.986624	ND	42156410
Q8BY89	Choline transporter-like protein 2	Slc44a2	Mus musculus	80 kDa	6	6	0.974027	ND	10112900
Q60865	Caprin-1	Caprin1	Mus musculus	78 kDa	6	6	0.987133	ND	39956090
Q60710	Deoxynucleoside triphosphate triphosphohydrolase SAMHD1	Samhd1	Mus musculus	76 kDa	6	6	0.98199	ND	6095220
Q8VIJ6	Splicing factor, proline- and glutamine-rich	Sfpq	Mus musculus	75 kDa	6	6	0.985263	ND	34410400
Q9QUR8	Semaphorin-7A	Sema7a	Mus musculus	75 kDa	6	6	0.982073	ND	4761632
Q9R190	Metastasis-associated protein MTA2	Mta2	Mus musculus	75 kDa	6	5	0.97816	ND	3343372
Q08761	Vitamin K-dependent protein S	Pros1	Mus musculus	75 kDa	6	4	0.975947	ND	3560334
Q8BMA6	Signal recognition particle subunit SRP68	Srp68	Mus musculus	71 kDa	6	6	0.985285	ND	23419750
Q9DBG7	Signal recognition particle receptor subunit alpha	Srpra	Mus musculus	70 kDa	6	6	0.98509	ND	4837451
Q7TSV4	Phosphoglucomutase-2	Pgm2	Mus musculus	69 kDa	6	4	0.977391	ND	6632550
Q3TCN2	Putative phospholipase B-like 2	Plbd2	Mus musculus	66 kDa	6	6	0.984824	ND	7582755
Q8BJW6	Eukaryotic translation initiation factor 2A	Eif2a	Mus musculus	64 kDa	6	6	0.98695	ND	14881170
P11214	Tissue-type plasminogen activator	Plat	Mus musculus	63 kDa	6	6	0.975735	ND	4300252
Q60715	Prolyl 4-hydroxylase subunit alpha-1	P4ha1	Mus musculus	61 kDa	6	6	0.982688	ND	11566640
P39688	Tyrosine-protein kinase Fyn	Fyn	Mus musculus	61 kDa	6	4	0.978077	ND	3123258
P26443	Glutamate dehydrogenase 1, mitochondrial	Glud1	Mus musculus	61 kDa	6	6	0.97797	ND	11841580
Q60716	Prolyl 4-hydroxylase subunit alpha-2	P4ha2	Mus musculus	61 kDa	6	3	0.976205	ND	2461109
Q3TIR3	Synembryn-A	Ric8a	Mus musculus	60 kDa	6	6	0.985369	ND	3604992
Q8VBW6	NEDD8-activating enzyme E1 regulatory subunit	Nae1	Mus musculus	60 kDa	6	6	0.980258	ND	9547934
Q3UKJ7	WD40 repeat-containing protein SMU1	Smu1	Mus musculus	58 kDa	6	6	0.98647	ND	13295570
Q8C0C7	Phenylalanine--tRNA ligase alpha subunit	Farsa	Mus musculus	58 kDa	6	6	0.986237	ND	17466050
Q9DAW6	U4/U6 small nuclear ribonucleoprotein Prp4	Prpf4	Mus musculus	58 kDa	6	6	0.984813	ND	3123948
Q9JLV6	Bifunctional polynucleotide phosphatase/kinase	Pnkp	Mus musculus	57 kDa	6	6	0.982422	ND	4682084
Q8BVE3	V-type proton ATPase subunit H	Atp6v1h	Mus musculus	56 kDa	6	6	0.982084	ND	3953798
P70288	Histone deacetylase 2	Hdac2	Mus musculus	55 kDa	6	4	0.98392	ND	6777365
O09106	Histone deacetylase 1	Hdac1	Mus musculus	55 kDa	6	4	0.980601	ND	10490150
Q9WUM3	Coronin-1B	Coro1b	Mus musculus	54 kDa	6	6	0.986233	ND	31542050
Q9Z108	Double-stranded RNA-binding protein Staufen homolog 1	Stau1	Mus musculus	54 kDa	6	6	0.980142	ND	11887950
O35474	EGF-like repeat and discoidin I-like domain-containing protein 3	Edil3	Mus musculus	54 kDa	6	6	0.976255	ND	6180291
Q61655	ATP-dependent RNA helicase DDX19A	Ddx19a	Mus musculus	54 kDa	6	6	0.974569	ND	6380299
Q9JLJ2	4-trimethylaminobutyraldehyde dehydrogenase	Aldh9a1	Mus musculus	54 kDa	6	6	0.972908	ND	5186185
Q9D8W5	26S proteasome non-ATPase regulatory subunit 12	Psmd12	Mus musculus	53 kDa	6	6	0.987172	ND	41880530
Q9CYT6	Adenylyl cyclase-associated protein 2	Cap2	Mus musculus	53 kDa	6	6	0.971778	ND	71551230
Q62376	U1 small nuclear ribonucleoprotein 70 kDa	Snrnp70	Mus musculus	52 kDa	6	6	0.978331	ND	19384370
P13439	Uridine 5'-monophosphate synthase	Umps	Mus musculus	52 kDa	6	6	0.978238	ND	5561367
Q8VI78	Phospholipase A1 member A	Pla1a	Mus musculus	50 kDa	6	6	0.984358	ND	36685550
P82343	N-acylglucosamine 2-epimerase	Renbp	Mus musculus	50 kDa	6	6	0.984017	ND	4701330
P47739	Aldehyde dehydrogenase, dimeric NADP-preferring	Aldh3a1	Mus musculus	50 kDa	6	5	0.981348	ND	9761247
P59325	Eukaryotic translation initiation factor 5	Eif5	Mus musculus	49 kDa	6	6	0.985829	ND	16102520
O35737	Heterogeneous nuclear ribonucleoprotein H	Hnrnph1	Mus musculus	49 kDa	6	4	0.979328	ND	5283890
O88712	C-terminal-binding protein 1	Ctbp1	Mus musculus	48 kDa	6	5	0.967444	ND	6038971
Q62443	Neuronal pentraxin-1	Nptx1	Mus musculus	47 kDa	6	6	0.987151	ND	32987770
Q9D8E6	60S ribosomal protein L4	Rpl4	Mus musculus	47 kDa	6	6	0.986872	ND	81811460
Q9QWR8	Alpha-N-acetylgalactosaminidase	Naga	Mus musculus	47 kDa	6	6	0.980282	ND	6661195
P12367	cAMP-dependent protein kinase type II-alpha regulatory subunit	Prkar2a	Mus musculus	45 kDa	6	4	0.982548	ND	7608232
Q3THS6	S-adenosylmethionine synthase isoform type-2	Mat2a	Mus musculus	44 kDa	6	6	0.986905	ND	14771090
Q9Z1G3	V-type proton ATPase subunit C 1	Atp6v1c1	Mus musculus	44 kDa	6	6	0.971446	ND	7066953
Q91V12	Cytosolic acyl coenzyme A thioester hydrolase	Acot7	Mus musculus	43 kDa	6	6	0.986971	ND	73425940
Q9DBC7	cAMP-dependent protein kinase type I-alpha regulatory subunit	Prkar1a	Mus musculus	43 kDa	6	6	0.986582	ND	31415660
Q78ZA7	Nucleosome assembly protein 1-like 4	Nap1l4	Mus musculus	43 kDa	6	5	0.985429	ND	24612090
Q9R0N0	Galactokinase	Galk1	Mus musculus	42 kDa	6	6	0.98621	ND	18357460
Q8BVQ5	Protein phosphatase methylesterase 1	Ppme1	Mus musculus	42 kDa	6	6	0.972994	ND	12761150
Q99KV1	DnaJ homolog subfamily B member 11	Dnajb11	Mus musculus	41 kDa	6	6	0.986217	ND	23576270
Q9QZQ8	Core histone macro-H2A.1	Macroh2a1	Mus musculus	40 kDa	6	6	0.986374	ND	53198710
P28654	Decorin	Dcn	Mus musculus	40 kDa	6	6	0.986214	ND	16282350
P54923	[Protein ADP-ribosylarginine] hydrolase	Adprh	Mus musculus	40 kDa	6	6	0.985395	ND	29072470
Q9JHJ0	Tropomodulin-3	Tmod3	Mus musculus	40 kDa	6	6	0.972096	ND	7271312
Q8C0E2	Vacuolar protein sorting-associated protein 26B	Vps26b	Mus musculus	39 kDa	6	6	0.985322	ND	12306380
P54751	CMP-N-acetylneuraminate-beta-galactosamide-alpha-2,3-sialyltransferase 1	St3gal1	Mus musculus	39 kDa	6	6	0.976515	ND	8136499
Q9CQM9	Glutaredoxin-3	Glrx3	Mus musculus	38 kDa	6	6	0.986733	ND	20665300
Q9WUP7	Ubiquitin carboxyl-terminal hydrolase isozyme L5	Uchl5	Mus musculus	38 kDa	6	6	0.984401	ND	8570230
O08915	AH receptor-interacting protein	Aip	Mus musculus	38 kDa	6	6	0.981955	ND	7514635
Q3ULJ0	Glycerol-3-phosphate dehydrogenase 1-like protein	Gpd1l	Mus musculus	38 kDa	6	6	0.976433	ND	6679666
Q9CX34	Protein SGT1 homolog	Sugt1	Mus musculus	38 kDa	6	6	0.973949	ND	25939200
Q9WVA3	Mitotic checkpoint protein BUB3	Bub3	Mus musculus	37 kDa	6	6	0.981999	ND	21535230
P50752	Troponin T, cardiac muscle	Tnnt2	Mus musculus	36 kDa	6	6	0.984836	ND	16008410
P45377	Aldose reductase-related protein 2	Akr1b8	Mus musculus	36 kDa	6	6	0.984184	ND	29997440
O70400	PDZ and LIM domain protein 1	Pdlim1	Mus musculus	36 kDa	6	3	0.978549	ND	4078508
Q922Q8	Leucine-rich repeat-containing protein 59	Lrrc59	Mus musculus	35 kDa	6	6	0.985813	ND	28553190
Q64674	Spermidine synthase	Srm	Mus musculus	34 kDa	6	6	0.984756	ND	19775060
Q9EQU5	Protein SET	Set	Mus musculus	33 kDa	6	6	0.986055	ND	268264400
Q64012	RNA-binding protein Raly	Raly	Mus musculus	33 kDa	6	6	0.98295	ND	6173062
Q8VBV3	Exosome complex component RRP4	Exosc2	Mus musculus	33 kDa	6	6	0.979485	ND	4822798
O35129	Prohibitin-2	Phb2	Mus musculus	33 kDa	6	6	0.971941	ND	8012896
P53810	Phosphatidylinositol transfer protein alpha isoform	Pitpna	Mus musculus	32 kDa	6	6	0.981774	ND	18140940
Q9R0Q4	Mortality factor 4-like protein 2	Morf4l2	Mus musculus	32 kDa	6	5	0.979257	ND	4998456
Q99020	Heterogeneous nuclear ribonucleoprotein A/B	Hnrnpab	Mus musculus	31 kDa	6	5	0.986639	ND	49946540
Q7TQI3	Ubiquitin thioesterase OTUB1	Otub1	Mus musculus	31 kDa	6	6	0.985927	ND	36088100
Q8BH58	TIP41-like protein	Tiprl	Mus musculus	31 kDa	6	6	0.98095	ND	6268863
P97351	40S ribosomal protein S3a	Rps3a	Mus musculus	30 kDa	6	6	0.986915	ND	69601400
P70195	Proteasome subunit beta type-7	Psmb7	Mus musculus	30 kDa	6	6	0.98448	ND	89133860
O70435	Proteasome subunit alpha type-3	Psma3	Mus musculus	28 kDa	6	6	0.985767	ND	74046810
P50518	V-type proton ATPase subunit E 1	Atp6v1e1	Mus musculus	26 kDa	6	5	0.983035	ND	18245290
P58044	Isopentenyl-diphosphate Delta-isomerase 1	Idi1	Mus musculus	26 kDa	6	6	0.977994	ND	10512410
P63158	High mobility group protein B1	Hmgb1	Mus musculus	25 kDa	6	5	0.984455	ND	101457000
Q9DBZ5	Eukaryotic translation initiation factor 3 subunit K	Eif3k	Mus musculus	25 kDa	6	6	0.983242	ND	34203040
P63073	Eukaryotic translation initiation factor 4E	Eif4e	Mus musculus	25 kDa	6	6	0.982222	ND	26599900
P62821	Ras-related protein Rab-1A	Rab1A	Mus musculus	23 kDa	6	3	0.985552	ND	6617173
Q8CI43	Myosin light chain 6B	Myl6b	Mus musculus	23 kDa	6	5	0.980557	ND	13758220
P61087	Ubiquitin-conjugating enzyme E2 K	Ube2k	Mus musculus	22 kDa	6	6	0.985363	ND	31587170
Q9CQW2	ADP-ribosylation factor-like protein 8B	Arl8b	Mus musculus	22 kDa	6	3	0.978176	ND	6513568
P99029	Peroxiredoxin-5, mitochondrial	Prdx5	Mus musculus	22 kDa	6	6	0.97659	ND	40293510
P61205	ADP-ribosylation factor 3	Arf3	Mus musculus	21 kDa	6	1	0.986196	ND	1158095
P23198	Chromobox protein homolog 3	Cbx3	Mus musculus	21 kDa	6	5	0.98508	ND	35045510
P97314	Cysteine and glycine-rich protein 2	Csrp2	Mus musculus	21 kDa	6	6	0.983548	ND	11257430
Q9CPR4	60S ribosomal protein L17	Rpl17	Mus musculus	21 kDa	6	6	0.981409	ND	21789740
P84084	ADP-ribosylation factor 5	Arf5	Mus musculus	21 kDa	6	1	0.978571	ND	7215182
P61750	ADP-ribosylation factor 4	Arf4	Mus musculus	20 kDa	6	2	0.985395	ND	4043733
P62270	40S ribosomal protein S18	Rps18	Mus musculus	18 kDa	6	6	0.98706	ND	133746000
Q01768	Nucleoside diphosphate kinase B	Nme2	Mus musculus	17 kDa	6	3	0.986195	ND	145687900
Q58A65	C-Jun-amino-terminal kinase-interacting protein 4	Spag9	Mus musculus	146 kDa	6	6	0.970367	ND	4340882
Q7TMB8	Cytoplasmic FMR1-interacting protein 1	Cyfip1	Mus musculus	145 kDa	6	4	0.983337	ND	5811477
Q9JJ28	Protein flightless-1 homolog	Flii	Mus musculus	145 kDa	6	6	0.977291	ND	10141920
O08808	Protein diaphanous homolog 1	Diaph1	Mus musculus	139 kDa	6	6	0.978777	ND	5645592
P28660	Nck-associated protein 1	Nckap1	Mus musculus	129 kDa	6	6	0.981181	ND	4768952
Q6ZQ58	La-related protein 1	Larp1	Mus musculus	121 kDa	6	6	0.981194	ND	6441933
Q8C129	Leucyl-cystinyl aminopeptidase	Lnpep	Mus musculus	117 kDa	6	6	0.982001	ND	9429615
P97434	Myosin phosphatase Rho-interacting protein	Mprip	Mus musculus	116 kDa	6	6	0.97931	ND	3829666
P58281	Dynamin-like 120 kDa protein, mitochondrial	Opa1	Mus musculus	111 kDa	6	6	0.958218	ND	7424129
Q9JLI8	Squamous cell carcinoma antigen recognized by T-cells 3	Sart3	Mus musculus	110 kDa	6	6	0.976256	ND	5367707
Q569Z6	Thyroid hormone receptor-associated protein 3	Thrap3	Mus musculus	108 kDa	6	5	0.980238	ND	7740001
P30999	Catenin delta-1	Ctnnd1	Mus musculus	105 kDa	6	6	0.976925	ND	5393328
Q6P2B1	Transportin-3	Tnpo3	Mus musculus	104 kDa	6	6	0.986118	ND	6524275
Q8K009	Mitochondrial 10-formyltetrahydrofolate dehydrogenase	Aldh1l2	Mus musculus	102 kDa	6	6	0.970931	ND	3141493
Q8K2I4	Beta-mannosidase	Manba	Mus musculus	101 kDa	6	6	0.97237	ND	9357471
B2RY56	RNA-binding protein 25	Rbm25	Mus musculus	100 kDa	6	6	0.973579	ND	7853391
O35551	Rab GTPase-binding effector protein 1	Rabep1	Mus musculus	100 kDa	6	6	0.970626	ND	4745786
Q6ZQ88	Lysine-specific histone demethylase 1A	Kdm1a	Mus musculus	93 kDa	5	5	0.972816	ND	4123675
P20918	Plasminogen	Plg	Mus musculus	91 kDa	5	1	0.981268	ND	18905680
P22892	AP-1 complex subunit gamma-1	Ap1g1	Mus musculus	91 kDa	5	5	0.971547	ND	5374176
P25976	Nucleolar transcription factor 1	Ubtf	Mus musculus	90 kDa	5	5	0.961624	ND	3452344
Q922K7	Probable 28S rRNA (cytosine-C(5))-methyltransferase	Nop2	Mus musculus	87 kDa	5	5	0.98337	ND	5825819
Q9Z110	Delta-1-pyrroline-5-carboxylate synthase	Aldh18a1	Mus musculus	87 kDa	5	5	0.975901	ND	4288243
Q99LI8	Hepatocyte growth factor-regulated tyrosine kinase substrate	Hgs	Mus musculus	86 kDa	5	5	0.977488	ND	9887656
Q00PI9	Heterogeneous nuclear ribonucleoprotein U-like protein 2	Hnrnpul2	Mus musculus	85 kDa	5	5	0.981609	ND	7418214
Q08048	Hepatocyte growth factor	Hgf	Mus musculus	83 kDa	5	5	0.986578	ND	6922620
Q8C167	Prolyl endopeptidase-like	Prepl	Mus musculus	83 kDa	5	5	0.97044	ND	3926276
Q8C1A5	Thimet oligopeptidase	Thop1	Mus musculus	78 kDa	5	5	0.985512	ND	8262861
P54818	Galactocerebrosidase	Galc	Mus musculus	77 kDa	5	5	0.980411	ND	4743010
Q80W65	Proprotein convertase subtilisin/kexin type 9	Pcsk9	Mus musculus	75 kDa	5	5	0.982657	ND	6750251
Q8K363	ATP-dependent RNA helicase DDX18	Ddx18	Mus musculus	74 kDa	5	5	0.978209	ND	1370468
P97494	Glutamate--cysteine ligase catalytic subunit	Gclc	Mus musculus	73 kDa	5	5	0.986511	ND	3710833
P0DOV2	Interferon-activable protein 204	Ifi204	Mus musculus	69 kDa	5	5	0.983354	ND	6717668
P35922	Synaptic functional regulator FMR1	Fmr1	Mus musculus	69 kDa	5	4	0.983153	ND	5446325
Q8VEE4	Replication protein A 70 kDa DNA-binding subunit	Rpa1	Mus musculus	69 kDa	5	5	0.961925	ND	6718413
O88487	Cytoplasmic dynein 1 intermediate chain 2	Dync1i2	Mus musculus	68 kDa	5	5	0.980267	ND	13792390
Q8CJ53	Cdc42-interacting protein 4	Trip10	Mus musculus	68 kDa	5	5	0.978581	ND	8454581
Q60770	Syntaxin-binding protein 3	Stxbp3	Mus musculus	68 kDa	5	3	0.971647	ND	1578789
Q91VH2	Sorting nexin-9	Snx9	Mus musculus	67 kDa	5	5	0.981859	ND	10715900
P97873	Lysyl oxidase homolog 1	Loxl1	Mus musculus	67 kDa	5	5	0.98116	ND	7531246
Q8N7N5	DDB1- and CUL4-associated factor 8	Dcaf8	Mus musculus	66 kDa	5	5	0.980948	ND	6537441
Q9WVG6	Histone-arginine methyltransferase CARM1	Carm1	Mus musculus	66 kDa	5	5	0.969611	ND	13639860
Q505F5	Leucine-rich repeat-containing protein 47	Lrrc47	Mus musculus	64 kDa	5	5	0.9506	ND	4210493
Q99PP9	Tripartite motif-containing protein 16	Trim16	Mus musculus	63 kDa	5	5	0.97596	ND	3523279
Q8BZF8	Phosphoglucomutase-like protein 5	Pgm5	Mus musculus	62 kDa	5	5	0.981993	ND	6506834
Q8R317	Ubiquilin-1	Ubqln1	Mus musculus	62 kDa	5	3	0.970181	ND	1281156
Q8BFR4	N-acetylglucosamine-6-sulfatase	Gns	Mus musculus	61 kDa	5	5	0.982885	ND	4580914
Q62523	Zyxin	Zyx	Mus musculus	61 kDa	5	4	0.980507	ND	10778140
O08848	60 kDa SS-A/Ro ribonucleoprotein	RO60	Mus musculus	60 kDa	5	5	0.984421	ND	10138460
Q8BMP6	Golgi resident protein GCP60	Acbd3	Mus musculus	60 kDa	5	5	0.982847	ND	6336812
P52293	Importin subunit alpha-1	Kpna2	Mus musculus	58 kDa	5	5	0.984538	ND	7954150
O35343	Importin subunit alpha-3	Kpna4	Mus musculus	58 kDa	5	4	0.983822	ND	5339240
P17439	Lysosomal acid glucosylceramidase	Gba	Mus musculus	58 kDa	5	5	0.982544	ND	14386530
Q9ESX5	H/ACA ribonucleoprotein complex subunit DKC1	Dkc1	Mus musculus	57 kDa	5	5	0.979494	ND	3276523
O35074	Prostacyclin synthase	Ptgis	Mus musculus	57 kDa	5	5	0.977375	ND	4369650
Q922V4	Pleiotropic regulator 1	Plrg1	Mus musculus	57 kDa	5	5	0.968997	ND	5192459
P97384	Annexin A11	Anxa11	Mus musculus	54 kDa	5	5	0.98537	ND	14602650
Q8R054	Sushi repeat-containing protein SRPX2	Srpx2	Mus musculus	53 kDa	5	5	0.984328	ND	17831320
P70402	Myosin-binding protein H	Mybph	Mus musculus	53 kDa	5	5	0.979572	ND	11994610
Q8BMD8	Calcium-binding mitochondrial carrier protein SCaMC-1	Slc25a24	Mus musculus	53 kDa	5	5	0.97736	ND	7600217
Q6P1F6	Serine/threonine-protein phosphatase 2A 55 kDa regulatory subunit B alpha isoform	Ppp2r2a	Mus musculus	52 kDa	5	3	0.978643	ND	6874690
Q91WM3	U3 small nucleolar RNA-interacting protein 2	Rrp9	Mus musculus	52 kDa	5	5	0.974014	ND	2965692
Q62203	Splicing factor 3A subunit 2	Sf3a2	Mus musculus	50 kDa	5	5	0.98154	ND	29461120
Q5FWK3	Rho GTPase-activating protein 1	Arhgap1	Mus musculus	50 kDa	5	2	0.975046	ND	5677119
Q9JIM1	Equilibrative nucleoside transporter 1	Slc29a1	Mus musculus	50 kDa	5	5	0.967802	ND	7600785
P56546	C-terminal-binding protein 2	Ctbp2	Mus musculus	49 kDa	5	4	0.981291	ND	3034203
Q9CQC6	Basic leucine zipper and W2 domain-containing protein 1	Bzw1	Mus musculus	48 kDa	5	5	0.985824	ND	30652000
Q91VK1	Basic leucine zipper and W2 domain-containing protein 2	Bzw2	Mus musculus	48 kDa	5	5	0.985352	ND	14957570
P47226	Testin	Tes	Mus musculus	48 kDa	5	2	0.976752	ND	508929
Q91XL3	UDP-glucuronic acid decarboxylase 1	Uxs1	Mus musculus	48 kDa	5	5	0.974407	ND	6037015
Q9DBG5	Perilipin-3	Plin3	Mus musculus	47 kDa	5	5	0.986076	ND	9713798
Q9WV60	Glycogen synthase kinase-3 beta	Gsk3b	Mus musculus	47 kDa	5	5	0.984148	ND	5432815
P54775	26S proteasome regulatory subunit 6B	Psmc4	Mus musculus	47 kDa	5	5	0.983202	ND	13740690
Q6P8X1	Sorting nexin-6	Snx6	Mus musculus	47 kDa	5	5	0.981593	ND	8293546
P05202	Aspartate aminotransferase, mitochondrial	Got2	Mus musculus	47 kDa	5	5	0.978281	ND	16443940
P17183	Gamma-enolase	Eno2	Mus musculus	47 kDa	5	2	0.965595	ND	21244180
Q9Z2X1	Heterogeneous nuclear ribonucleoprotein F	Hnrnpf	Mus musculus	46 kDa	5	3	0.977542	ND	14342360
Q61081	Hsp90 co-chaperone Cdc37	Cdc37	Mus musculus	45 kDa	5	5	0.98571	ND	30866990
Q3THG9	Alanyl-tRNA editing protein Aarsd1	Aarsd1	Mus musculus	45 kDa	5	5	0.978568	ND	5466202
O89112	Glutathione S-transferase LANCL1	Lancl1	Mus musculus	45 kDa	5	5	0.971907	ND	4956430
Q99K70	Ras-related GTP-binding protein C	Rragc	Mus musculus	44 kDa	5	5	0.985337	ND	8865259
Q61239	Protein farnesyltransferase/geranylgeranyltransferase type-1 subunit alpha	Fnta	Mus musculus	44 kDa	5	5	0.985317	ND	3508247
Q61187	Tumor susceptibility gene 101 protein	Tsg101	Mus musculus	44 kDa	5	5	0.984428	ND	6378128
P18572	Basigin	Bsg	Mus musculus	42 kDa	5	5	0.9859	ND	9372350
P21278	Guanine nucleotide-binding protein subunit alpha-11	Gna11	Mus musculus	42 kDa	5	5	0.982903	ND	3432942
Q920E5	Farnesyl pyrophosphate synthase	Fdps	Mus musculus	41 kDa	5	5	0.986662	ND	29238700
Q8CAY6	Acetyl-CoA acetyltransferase, cytosolic	Acat2	Mus musculus	41 kDa	5	4	0.984429	ND	20168480
Q9CZ44	NSFL1 cofactor p47	Nsfl1c	Mus musculus	41 kDa	5	5	0.983086	ND	4948649
P60762	Mortality factor 4-like protein 1	Morf4l1	Mus musculus	41 kDa	5	4	0.980609	ND	3852934
Q8BG05	Heterogeneous nuclear ribonucleoprotein A3	Hnrnpa3	Mus musculus	40 kDa	5	4	0.984999	ND	63477870
P49813	Tropomodulin-1	Tmod1	Mus musculus	40 kDa	5	5	0.984996	ND	3768215
P08752	Guanine nucleotide-binding protein G(i) subunit alpha-2	Gnai2	Mus musculus	40 kDa	5	3	0.979968	ND	5197701
Q8R2U0	Nucleoporin SEH1	Seh1l	Mus musculus	40 kDa	5	5	0.975713	ND	5254057
P24452	Macrophage-capping protein	Capg	Mus musculus	39 kDa	5	5	0.986535	ND	50475890
O54984	ATPase GET3	Get3	Mus musculus	39 kDa	5	5	0.985915	ND	15993210
Q8CI19	Platelet-derived growth factor C	Pdgfc	Mus musculus	39 kDa	5	5	0.984179	ND	14708320
Q99P31	Hsp70-binding protein 1	Hspbp1	Mus musculus	39 kDa	5	5	0.982357	ND	5774808
P06797	Procathepsin L	Ctsl	Mus musculus	38 kDa	5	5	0.987274	ND	415119900
Q61990	Poly(rC)-binding protein 2	Pcbp2	Mus musculus	38 kDa	5	3	0.985194	ND	27747260
P14152	Malate dehydrogenase, cytoplasmic	Mdh1	Mus musculus	37 kDa	5	2	0.986865	ND	31140580
P62874	Guanine nucleotide-binding protein G(I)/G(S)/G(T) subunit beta-1	Gnb1	Mus musculus	37 kDa	5	3	0.98683	ND	8587542
P58389	Serine/threonine-protein phosphatase 2A activator	Ptpa	Mus musculus	37 kDa	5	5	0.984853	ND	13591380
Q8BGR9	Ubiquitin-like domain-containing CTD phosphatase 1	Ublcp1	Mus musculus	37 kDa	5	5	0.983509	ND	9318030
P23591	GDP-L-fucose synthase	Gfus	Mus musculus	36 kDa	5	5	0.984052	ND	12768350
O88545	COP9 signalosome complex subunit 6	Cops6	Mus musculus	36 kDa	5	5	0.980614	ND	17699680
Q9CWI3	BRCA2 and CDKN1A-interacting protein	Bccip	Mus musculus	36 kDa	5	5	0.970741	ND	2823861
Q91YR9	Prostaglandin reductase 1	Ptgr1	Mus musculus	36 kDa	5	5	0.95914	ND	5569898
Q8R010	Aminoacyl tRNA synthase complex-interacting multifunctional protein 2	Aimp2	Mus musculus	35 kDa	5	5	0.986541	ND	16988610
Q9D7G0	Ribose-phosphate pyrophosphokinase 1	Prps1	Mus musculus	35 kDa	5	1	0.98225	ND	2968764
Q9Z0L8	Gamma-glutamyl hydrolase	Ggh	Mus musculus	35 kDa	5	5	0.981526	ND	20467180
Q9CS42	Ribose-phosphate pyrophosphokinase 2	Prps2	Mus musculus	35 kDa	5	1	0.977048	ND	2184129
Q91VH6	Protein MEMO1	Memo1	Mus musculus	34 kDa	5	5	0.983828	ND	14561660
Q9DCN2	NADH-cytochrome b5 reductase 3	Cyb5r3	Mus musculus	34 kDa	5	5	0.983023	ND	12303650
P35550	rRNA 2'-O-methyltransferase fibrillarin	Fbl	Mus musculus	34 kDa	5	4	0.980781	ND	23359090
Q6S5C2	N-acetylglucosamine-1-phosphotransferase subunit gamma	Gnptg	Mus musculus	34 kDa	5	5	0.97497	ND	8704895
Q9D819	Inorganic pyrophosphatase	Ppa1	Mus musculus	33 kDa	5	5	0.985653	ND	29882710
P48962	ADP/ATP translocase 1	Slc25a4	Mus musculus	33 kDa	5	2	0.981734	ND	2473221
P97447	Four and a half LIM domains protein 1	Fhl1	Mus musculus	32 kDa	5	3	0.98621	ND	11221850
P42125	Enoyl-CoA delta isomerase 1, mitochondrial	Eci1	Mus musculus	32 kDa	5	5	0.975406	ND	4581044
Q60931	Voltage-dependent anion-selective channel protein 3	Vdac3	Mus musculus	31 kDa	5	5	0.987083	ND	18036910
P14148	60S ribosomal protein L7	Rpl7	Mus musculus	31 kDa	5	5	0.984413	ND	21750970
P48758	Carbonyl reductase [NADPH] 1	Cbr1	Mus musculus	31 kDa	5	5	0.983602	ND	11883920
P53811	Phosphatidylinositol transfer protein beta isoform	Pitpnb	Mus musculus	31 kDa	5	5	0.979699	ND	12253580
O55023	Inositol monophosphatase 1	Impa1	Mus musculus	30 kDa	5	5	0.987025	ND	13844300
P97822	Acidic leucine-rich nuclear phosphoprotein 32 family member E	Anp32e	Mus musculus	30 kDa	5	5	0.986809	ND	22061670
P40237	CD82 antigen	Cd82	Mus musculus	30 kDa	5	5	0.985903	ND	67241470
P12970	60S ribosomal protein L7a	Rpl7a	Mus musculus	30 kDa	5	5	0.985881	ND	62102340
P17918	Proliferating cell nuclear antigen	Pcna	Mus musculus	29 kDa	5	5	0.986436	ND	57892700
P57759	Endoplasmic reticulum resident protein 29	Erp29	Mus musculus	29 kDa	5	5	0.986274	ND	22759590
P99026	Proteasome subunit beta type-4	Psmb4	Mus musculus	29 kDa	5	5	0.985262	ND	63205940
O35381	Acidic leucine-rich nuclear phosphoprotein 32 family member A	Anp32a	Mus musculus	29 kDa	5	5	0.984756	ND	36757480
Q64008	Ras-related protein Rab-34	Rab34	Mus musculus	29 kDa	5	4	0.979251	ND	4692151
P16110	Galectin-3	Lgals3	Mus musculus	28 kDa	5	5	0.987159	ND	54612170
P57784	U2 small nuclear ribonucleoprotein A'	Snrpa1	Mus musculus	28 kDa	5	5	0.985427	ND	12792660
Q9WV55	Vesicle-associated membrane protein-associated protein A	Vapa	Mus musculus	28 kDa	5	4	0.985035	ND	40170970
Q9DCW4	Electron transfer flavoprotein subunit beta	Etfb	Mus musculus	28 kDa	5	5	0.982641	ND	5762571
Q6PDM2	Serine/arginine-rich splicing factor 1	Srsf1	Mus musculus	28 kDa	5	5	0.978892	ND	22848120
P48774	Glutathione S-transferase Mu 5	Gstm5	Mus musculus	27 kDa	5	4	0.977707	ND	1565410
O09131	Glutathione S-transferase omega-1	Gsto1	Mus musculus	27 kDa	5	5	0.974326	ND	21296260
Q8VE70	Programmed cell death protein 10	Pdcd10	Mus musculus	25 kDa	5	5	0.983943	ND	11051490
Q99M71	Mammalian ependymin-related protein 1	Epdr1	Mus musculus	25 kDa	5	5	0.97746	ND	6314608
P35279	Ras-related protein Rab-6A	Rab6a	Mus musculus	24 kDa	5	4	0.986859	ND	18678350
P62242	40S ribosomal protein S8	Rps8	Mus musculus	24 kDa	5	5	0.986592	ND	20218410
P30681	High mobility group protein B2	Hmgb2	Mus musculus	24 kDa	5	4	0.985486	ND	86213730
P34022	Ran-specific GTPase-activating protein	Ranbp1	Mus musculus	24 kDa	5	5	0.983593	ND	26313600
Q9R1P3	Proteasome subunit beta type-2	Psmb2	Mus musculus	23 kDa	5	1	0.986768	ND	74921770
O54879	High mobility group protein B3	Hmgb3	Mus musculus	23 kDa	5	5	0.981724	ND	55121690
P35278	Ras-related protein Rab-5C	Rab5c	Mus musculus	23 kDa	5	2	0.970971	ND	8533395
Q9QUI0	Transforming protein RhoA	Rhoa	Mus musculus	22 kDa	5	5	0.987306	ND	125511700
P61759	Prefoldin subunit 3	Vbp1	Mus musculus	22 kDa	5	5	0.98648	ND	30285820
Q9D1G1	Ras-related protein Rab-1B	Rab1b	Mus musculus	22 kDa	5	2	0.980134	ND	2131713
P60766	Cell division control protein 42 homolog	Cdc42	Mus musculus	21 kDa	5	4	0.987078	ND	66298200
P61082	NEDD8-conjugating enzyme Ubc12	Ube2m	Mus musculus	21 kDa	5	5	0.986399	ND	30912070
Q07813	Apoptosis regulator BAX	Bax	Mus musculus	21 kDa	5	5	0.98374	ND	5160800
P09541	Myosin light chain 4	Myl4	Mus musculus	21 kDa	5	5	0.983688	ND	8379990
P08556	GTPase NRas	Nras	Mus musculus	21 kDa	5	2	0.93481	ND	3227132
P61600	N-alpha-acetyltransferase 20	Naa20	Mus musculus	20 kDa	5	5	0.983654	ND	15544030
P63325	40S ribosomal protein S10	Rps10	Mus musculus	19 kDa	5	5	0.985918	ND	98520790
P35979	60S ribosomal protein L12	Rpl12	Mus musculus	18 kDa	5	5	0.987073	ND	80218050
P19123	Troponin C, slow skeletal and cardiac muscles	Tnnc1	Mus musculus	18 kDa	5	5	0.986082	ND	95008970
P62281	40S ribosomal protein S11	Rps11	Mus musculus	18 kDa	5	5	0.984409	ND	50589460
P68037	Ubiquitin-conjugating enzyme E2 L3	Ube2l3	Mus musculus	18 kDa	5	5	0.982899	ND	18008300
P63323	40S ribosomal protein S12	Rps12	Mus musculus	15 kDa	5	1	0.980448	ND	33873380
Q8CG47	Structural maintenance of chromosomes protein 4	Smc4	Mus musculus	147 kDa	5	5	0.980508	ND	5384193
P62317	Small nuclear ribonucleoprotein Sm D2	Snrpd2	Mus musculus	14 kDa	5	5	0.986856	ND	86226320
Q8K1X1	WD repeat-containing protein 11	Wdr11	Mus musculus	136 kDa	5	5	0.970424	ND	2368355
Q61810	Latent-transforming growth factor beta-binding protein 3	Ltbp3	Mus musculus	134 kDa	5	5	0.972891	ND	3230620
Q9ES00	Ubiquitin conjugation factor E4 B	Ube4b	Mus musculus	133 kDa	5	2	0.981325	ND	1068820
P27046	Alpha-mannosidase 2	Man2a1	Mus musculus	132 kDa	5	5	0.976663	ND	2894850
P62315	Small nuclear ribonucleoprotein Sm D1	Snrpd1	Mus musculus	13 kDa	5	5	0.986947	ND	44857000
Q9EPR5	VPS10 domain-containing receptor SorCS2	Sorcs2	Mus musculus	129 kDa	5	5	0.976893	ND	3466089
E9Q634	Unconventional myosin-Ie	Myo1e	Mus musculus	127 kDa	5	5	0.980409	ND	3118006
Q99P72	Reticulon-4	Rtn4	Mus musculus	127 kDa	5	3	0.957439	ND	20245690
Q2KN98	Cytospin-A	Specc1l	Mus musculus	124 kDa	5	5	0.976522	ND	2619159
Q9Z1T1	AP-3 complex subunit beta-1	Ap3b1	Mus musculus	123 kDa	5	5	0.958064	ND	4792946
P83940	Elongin-C	Eloc	Mus musculus	12 kDa	5	5	0.979045	ND	10828880
Q6NV83	U2 snRNP-associated SURP motif-containing protein	U2surp	Mus musculus	118 kDa	5	5	0.974003	ND	4166615
Q6PAV2	Probable E3 ubiquitin-protein ligase HERC4	Herc4	Mus musculus	118 kDa	5	5	0.966458	ND	1841370
Q62470	Integrin alpha-3	Itga3	Mus musculus	117 kDa	5	5	0.985255	ND	6348142
O88532	Zinc finger RNA-binding protein	Zfr	Mus musculus	117 kDa	5	5	0.977548	ND	3677868
Q8K411	Presequence protease, mitochondrial	Pitrm1	Mus musculus	117 kDa	5	5	0.956709	ND	3216943
Q3UMY5	Echinoderm microtubule-associated protein-like 4	Eml4	Mus musculus	110 kDa	5	5	0.972192	ND	4135673
P97467	Peptidyl-glycine alpha-amidating monooxygenase	Pam	Mus musculus	109 kDa	5	2	0.977102	ND	4101513
Q61301	Catenin alpha-2	Ctnna2	Mus musculus	105 kDa	5	3	0.958719	ND	5800436
P46935	E3 ubiquitin-protein ligase NEDD4	Nedd4	Mus musculus	103 kDa	5	4	0.986901	ND	10466610
Q99MR6	Serrate RNA effector molecule homolog	Srrt	Mus musculus	100 kDa	5	5	0.985372	ND	5941404
Q811D0	Disks large homolog 1	Dlg1	Mus musculus	100 kDa	5	5	0.968331	ND	5592608
Q99LG2	Transportin-2	Tnpo2	Mus musculus	100 kDa	5	2	0.964886	ND	734365
