# Supplementary material for: Roles of pigment epithelium-derived factor in exercise-induced suppression of senescence and its impact on lung pathology in mice
Source: Aging (Albany NY). 2024 Jun 26;16(13):10670–93. doi: 10.18632/aging.205976 (PMC11272117; doi:10.18632/aging.205976)
Supplement: Supplementary Table 2 [file aging-16-205976-s003.xlsx]

## Sheet: Supplementary Table 2
Supplementary Table 2. List of proteins annotated as secreted.
Uniprot Ac.	Protein Name	Gene Symbol	Species	Molecular Weight	Identified Peptide Count	Total Unique Peptide Count	Protein Group Score	Control med	C2C12-CM
Q8CIE6	Coatomer subunit alpha	Copa	Mus musculus	138 kDa	32	5	0.983422	ND	10642460
P35441	Thrombospondin-1	Thbs1	Mus musculus	130 kDa	30	12	0.987229	ND	97346500
Q61207	Prosaposin	Psap	Mus musculus	61 kDa	18	18	0.986341	ND	563190300
Q8BND5	Sulfhydryl oxidase 1	Qsox1	Mus musculus	83 kDa	18	16	0.987227	ND	141352600
Q640N1	Adipocyte enhancer-binding protein 1	Aebp1	Mus musculus	128 kDa	17	17	0.985667	ND	154536000
Q9R045	Angiopoietin-related protein 2	Angptl2	Mus musculus	57 kDa	17	17	0.986915	ND	106682500
O08746	Matrilin-2	Matn2	Mus musculus	107 kDa	16	13	0.985757	ND	56183280
P97298	Pigment epithelium-derived factor	Serpinf1	Mus musculus	46 kDa	15	13	0.987707	ND	650002200
Q9CZD3	Glycine--tRNA ligase	Gars1	Mus musculus	82 kDa	15	5	0.984647	ND	65759980
P98063	Bone morphogenetic protein 1	Bmp1	Mus musculus	112 kDa	14	14	0.983642	ND	31530000
P10107	Annexin A1	Anxa1	Mus musculus	39 kDa	14	14	0.986398	ND	981813900
P70275	Semaphorin-3E	Sema3e	Mus musculus	90 kDa	14	14	0.984532	ND	182824900
Q62009	Periostin	Postn	Mus musculus	93 kDa	14	8	0.984661	ND	17842900
Q9JHR7	Insulin-degrading enzyme	Ide	Mus musculus	118 kDa	13	6	0.983589	ND	9795592
Q62356	Follistatin-related protein 1	Fstl1	Mus musculus	35 kDa	13	6	0.987194	ND	68060670
Q61398	Procollagen C-endopeptidase enhancer 1	Pcolce	Mus musculus	50 kDa	13	9	0.98594	ND	395134100
P21956	Lactadherin	Mfge8	Mus musculus	51 kDa	13	13	0.986968	ND	51410010
O35887	Calumenin	Calu	Mus musculus	37 kDa	12	12	0.986249	ND	163268700
Q9R118	Serine protease HTRA1	Htra1	Mus musculus	51 kDa	12	11	0.985814	ND	125928300
Q00493	Carboxypeptidase E	Cpe	Mus musculus	53 kDa	12	12	0.986223	ND	75789350
P28798	Progranulin	Grn	Mus musculus	63 kDa	12	12	0.984381	ND	83461540
Q9R0E1	Multifunctional procollagen lysine hydroxylase and glycosyltransferase LH3	Plod3	Mus musculus	85 kDa	12	11	0.98214	ND	14514380
Q62181	Semaphorin-3C	Sema3c	Mus musculus	85 kDa	12	12	0.980995	ND	17137740
P06869	Urokinase-type plasminogen activator	Plau	Mus musculus	48 kDa	11	11	0.985286	ND	41752930
Q3USZ8	Divergent protein kinase domain 2A	Dipk2a	Mus musculus	49 kDa	11	11	0.985874	ND	21954790
P13020	Gelsolin	Gsn	Mus musculus	86 kDa	11	6	0.986625	ND	49335450
Q920A5	Retinoid-inducible serine carboxypeptidase	Scpep1	Mus musculus	51 kDa	10	10	0.985681	ND	33118490
Q62177	Semaphorin-3B	Sema3b	Mus musculus	83 kDa	10	10	0.985759	ND	26526230
Q61581	Insulin-like growth factor-binding protein 7	Igfbp7	Mus musculus	29 kDa	9	5	0.98564	ND	62272220
Q07079	Insulin-like growth factor-binding protein 5	Igfbp5	Mus musculus	30 kDa	9	9	0.987521	ND	1237009000
P47877	Insulin-like growth factor-binding protein 2	Igfbp2	Mus musculus	33 kDa	9	6	0.985199	ND	736206500
Q9WV54	Acid ceramidase	Asah1	Mus musculus	45 kDa	9	9	0.987127	ND	76815090
P55065	Phospholipid transfer protein	Pltp	Mus musculus	54 kDa	9	9	0.986172	ND	93373150
Q3V1G4	Olfactomedin-like protein 2B	Olfml2b	Mus musculus	84 kDa	9	9	0.987182	ND	98800050
Q8BH34	Semaphorin-3D	Sema3d	Mus musculus	90 kDa	9	9	0.984907	ND	16380110
Q8BV57	Soluble scavenger receptor cysteine-rich domain-containing protein SSC5D	Ssc5d	Mus musculus	145 kDa	8	8	0.984277	ND	10481800
Q9D6X6	Serine protease 23	Prss23	Mus musculus	43 kDa	8	8	0.985556	ND	27582810
P22777	Plasminogen activator inhibitor 1	Serpine1	Mus musculus	45 kDa	8	7	0.985008	ND	16837420
Q6GU68	Immunoglobulin superfamily containing leucine-rich repeat protein	Islr	Mus musculus	46 kDa	8	6	0.987061	ND	101197300
O88968	Transcobalamin-2	Tcn2	Mus musculus	48 kDa	8	8	0.985446	ND	35622860
Q99KQ4	Nicotinamide phosphoribosyltransferase	Nampt	Mus musculus	55 kDa	8	8	0.969549	ND	13814650
Q6PB93	Polypeptide N-acetylgalactosaminyltransferase 2	Galnt2	Mus musculus	65 kDa	8	4	0.974976	ND	2526935
Q8VCT3	Aminopeptidase B	Rnpep	Mus musculus	72 kDa	8	8	0.984213	ND	15661910
P31230	Aminoacyl tRNA synthase complex-interacting multifunctional protein 1	Aimp1	Mus musculus	34 kDa	7	5	0.983257	ND	25526540
P06745	Glucose-6-phosphate isomerase	Gpi	Mus musculus	63 kDa	7	7	0.975196	ND	7445860
Q61468	Mesothelin	Msln	Mus musculus	69 kDa	7	7	0.983875	ND	29589790
Q8BI06	Cell migration-inducing and hyaluronan-binding protein	Cemip	Mus musculus	153 kDa	6	6	0.982784	ND	4919843
P63158	High mobility group protein B1	Hmgb1	Mus musculus	25 kDa	6	5	0.984455	ND	101457000
P54751	CMP-N-acetylneuraminate-beta-galactosamide-alpha-2,3-sialyltransferase 1	St3gal1	Mus musculus	39 kDa	6	6	0.976515	ND	8136499
Q8VI78	Phospholipase A1 member A	Pla1a	Mus musculus	50 kDa	6	6	0.984358	ND	36685550
O35474	EGF-like repeat and discoidin I-like domain-containing protein 3	Edil3	Mus musculus	54 kDa	6	6	0.976255	ND	6180291
Q08761	Vitamin K-dependent protein S	Pros1	Mus musculus	75 kDa	6	4	0.975947	ND	3560334
P98064	Mannan-binding lectin serine protease 1	Masp1	Mus musculus	80 kDa	6	5	0.986624	ND	42156410
Q61810	Latent-transforming growth factor beta-binding protein 3	Ltbp3	Mus musculus	134 kDa	5	5	0.972891	ND	3230620
P30681	High mobility group protein B2	Hmgb2	Mus musculus	24 kDa	5	4	0.985486	ND	86213730
Q99M71	Mammalian ependymin-related protein 1	Epdr1	Mus musculus	25 kDa	5	5	0.97746	ND	6314608
P16110	Galectin-3	Lgals3	Mus musculus	28 kDa	5	5	0.987159	ND	54612170
Q6S5C2	N-acetylglucosamine-1-phosphotransferase subunit gamma	Gnptg	Mus musculus	34 kDa	5	5	0.97497	ND	8704895
P06797	Procathepsin L	Ctsl	Mus musculus	38 kDa	5	5	0.987274	ND	415119900
Q8CI19	Platelet-derived growth factor C	Pdgfc	Mus musculus	39 kDa	5	5	0.984179	ND	14708320
Q8R054	Sushi repeat-containing protein SRPX2	Srpx2	Mus musculus	53 kDa	5	5	0.984328	ND	17831320
Q80W65	Proprotein convertase subtilisin/kexin type 9	Pcsk9	Mus musculus	75 kDa	5	5	0.982657	ND	6750251
