# Supplementary material for: Roles of pigment epithelium-derived factor in exercise-induced suppression of senescence and its impact on lung pathology in mice
Source: Aging (Albany NY). 2024 Jun 26;16(13):10670–93. doi: 10.18632/aging.205976 (PMC11272117; doi:10.18632/aging.205976)
Supplement: Supplementary Table 3 [file aging-16-205976-s004.xlsx]

## Sheet: Supplementary Table 3
Supplementary Table 3. Patient information.
Sex	Age	Ethnicity	BMI	Diagnosis	Symptoms	Smoking history	Serum PEDF (μg/mL)	FEV1 /FVC	Treatment
F	47	Caucasian	28.7	COPD	cough, weakness, fatigue, increasing shortness of breath	16 years 1 pack/day	28.398	36%	euphylline, bromhexine, mukaltin, oxygen therapy, Verospiron
F	50	Caucasian	27.3	COPD	chest pain, shortness of breath at walking, weakness, malaise	18 years 0.5 pack/day	28.704	0.55	euphylline, dexamethasone, Lasolvan, bromhexine, Verospiron
M	57	Caucasian	27.2	COPD	shortness of breath at walking, coughing up phlegm, chest pain	15 years 1 pack/day	28.896	0.45	euphylline, bromhexine, dexamethasone
F	50	Caucasian	26.3	COPD	increasing shortness of breath, cough with phlegm, chest pain	30 years 1 pack/day	26.613	0.35	euphylline, prednisolone, bromhexine, Eurespal
F	56	Caucasian	27.3	COPD	cough with phlegm, weakness, fatigue, shortness of breath at walking	20 years 1 pack/day	29.475	0.24	euphylline, prednisolone, mukaltin, Lasolvan, suprastin
F	40	Caucasian	26.8	COPD	weakness, malaise, cough, chest pain, shortness of breath	13 years 1 pack/day	33.029	0.45	prednisone, euphylline, Eurespal, suprastin
F	40	Caucasian	27.3	COPD	dry cough, shortness of breath at walking, during exercise, weakness	15 years 1 pack/day	33.11	0.55	bromhexine, mukaltin, inhalation with Lasolvan
M	45	Caucasian	26.1	COPD	severe dry cough, wheezing in the chest, shortness of breath with fast walking	20 years 1 pack/day	29.186	26%	euphylline, bromhexine, dexamethasone, mukaltin, oxygen therapy
F	52	Caucasian	29.4	COPD	dry cough, chest pain, weakness, shortness of breath with brisk walking	25 years 1 pack/day	29.958	34%	bromhexine, Lasolvan, dexamethasone, mukaltin, inhalation with berotec
F	48	Caucasian	23.4	COPD	chest pain, cough, weakness, phlegm, shortness of breath only with intense exertion	15 years 0.5 pack/day	33.688	45%	bromhexine, mukaltin, oxygen therapy
M	43	Caucasian	22.2	COPD	dry cough, weakness, chest pain, shortness of breath with fast walking	16 years 1 pack/day	27.288	40%	bromhexine, dexamethasone, mukaltin, inhalation with Berodual
F	41	Caucasian	22.3	COPD	dry cough, wheezing, shortness of breath on exertion	15 years 1 pack/day	32.177	0.45	Lasolvan, Eurespal, mukaltin
M	54	Caucasian	28.4	COPD	wheezing when breathing, dry cough, shortness of breath at walking quickly	23 years 1 pack/day	29.331	0.34	euphylline, bromhexine, dexamethasone, ceftriaxone, inhalation
M	41	Caucasian	33	COPD	cough, malaise, chest pain, shortness of breath	17 years 0.5 pack/day	25.037	0.26	bromhexine, dexamethasone, mukaltin, inhalation
M	42	Caucasian	27.7	COPD	dry cough, shortness of breath, chest pain, shortness of breath at walking fast, lifting	20 years 1 pack/day	28.993	0.55	bromhexine, Lasolvan, mukaltin, inhalation
M	48	Caucasian	30.9	COPD	cough with phlegm, chest pain, wheezing, shortness of breath at walking	16 years 1 pack/day	29.491	32%	Lasolvan, Eurespal, inhalation with Berodual
M	45	Caucasian	27.1	COPD	dry cough, wheezing, malaise, shortness of breath at walking	16 years 1 pack/day	30.1186	0.56	sinecod, bromhexine, dexamethasone, inhalation
M	42	Caucasian	27.8	COPD	dry cough, malaise, chest pain, shortness of breath at walking fast	16 years 1 pack/day	31.357	0.56	sinecod, Lasolvan, mukaltin
M	51	Caucasian	29.4	COPD	cough with phlegm, chest pain, shortness of breath on exertion	25 years 1 pack/day	30.971	0.5	bromhexine, Lasolvan, sumamed
M	54	Caucasian	28	COPD	coughing up phlegm, weakness, shortness of breath at walking, shortness of breath	26 years 1 pack/day	32.691	0.45	Eurespal, euphylline, dexamethasone, inhalation
