# Supplementary material for: Roles of pigment epithelium-derived factor in exercise-induced suppression of senescence and its impact on lung pathology in mice
Source: Aging (Albany NY). 2024 Jun 26;16(13):10670–93. doi: 10.18632/aging.205976 (PMC11272117; doi:10.18632/aging.205976)
Supplement: Supplementary Table 4 [file aging-16-205976-s005.xlsx]

## Sheet: Supplementary Table 4
Supplementary Table 4. Differentially expressed genes in control vs PEDF stimulated MEFs detected by RNA-Seq.
GeneID	gene_sym	log2FoldChange(PEDF/Control)	pvalue	locus	gene_biotype	Control_1_RLE	Control_2_RLE	PEDF_1_RLE	PEDF_2_RLE
ENSMUSG00000107937	Gm44200	-6.08425	0.00119731	chr6:113607475-113611527	sense_intronic	8.89432	15.6256	0	0
ENSMUSG00000062327	T	-5.26814	0.0172643	chr17:8434423-8442496	protein_coding	12.2297	1.83831	0	0
ENSMUSG00000104872	1700008B11Rik	-5.18228	0.0235136	chr5:121835195-121835828	antisense	1.11179	11.949	0	0
ENSMUSG00000117655	6720468P15Rik	-5.02871	0.0255028	chr19:57497390-57512784	lincRNA	4.44716	7.35323	0	0
ENSMUSG00000050092	Sprr2b	-4.93317	0.0310497	chr3:92316620-92318085	protein_coding	5.55895	5.51492	0	0
ENSMUSG00000042631	Xkr7	-4.87843	0.0391242	chr2:153031852-153055775	protein_coding	8.89432	1.83831	0	0
ENSMUSG00000070563	Spaca4	-4.86438	0.0397596	chr7:45725107-45725813	protein_coding	2.22358	8.27238	0	0
ENSMUSG00000070076	Mir127	-4.83085	0.0393382	chr12:109592846-109592915	miRNA	6.67074	3.67661	0	0
ENSMUSG00000099655	2310034G01Rik	-4.15588	0.032493	chr19:46348201-46350302	protein_coding	6.67074	11.0298	1.05467	0
ENSMUSG00000085088	4931413K12Rik	-4.06266	0.0398133	chr11:75589665-75594771	processed_transcript	5.55895	11.0298	1.05467	0
ENSMUSG00000117416	Gm5064	-3.93945	0.0490605	chr18:28187110-28188817	processed_pseudogene	8.89432	6.43407	1.05467	0
ENSMUSG00000108546	Gm44662	-3.72019	0.00319671	chr7:30916983-30946824	lincRNA	23.3476	14.7065	0	2.76102
ENSMUSG00000081673	Gm14794	-3.39366	0.0438798	chrX:88749452-88749643	processed_pseudogene	4.44716	77.2089	3.16402	4.60169
ENSMUSG00000061991	H2ac10	-3.39328	0.0385042	chr13:23533906-23534304	protein_coding	17.7886	3.67661	2.10935	0
ENSMUSG00000104580	Gm42620	-2.76155	0.00362204	chr5:103513445-103533021	antisense	27.7948	19.3022	4.2187	2.76102
ENSMUSG00000079333	Gm11096	-2.64255	0.026851	chr17:81441763-81441923	protein_coding	23.3476	8.27238	4.2187	0.920339
ENSMUSG00000098975	Gm27177	-2.62381	0.00495742	chr14:69582164-69683286	antisense	443.604	113.975	52.7337	37.7339
ENSMUSG00000106526	Gm42604	-2.3879	0.0481258	chr5:96735547-96739364	antisense	15.5651	10.1107	2.10935	2.76102
ENSMUSG00000118081	Gm50138	-2.36543	0.0334576	chr17:31446490-31461835	antisense	14.4533	15.6256	2.10935	3.68135
ENSMUSG00000113178	Mylf-ps	-1.98324	0.0177363	chr12:101221997-101222417	processed_pseudogene	32.2419	21.1405	3.16402	10.1237
ENSMUSG00000089736	Tgfbr3l	-1.64239	0.0375094	chr8:4248214-4251423	protein_coding	15.5651	39.5236	9.49207	8.28305
ENSMUSG00000087263	Gm15726	-1.08043	0.0245236	chrX:169979047-169985232	antisense	53.3659	66.179	24.2575	32.2118
ENSMUSG00000045903	Npas4	-1.05843	0.0473643	chr19:4984355-4990316	protein_coding	44.4716	47.796	23.2028	21.1678
ENSMUSG00000078870	Gm14410	-1.01812	0.00298568	chr2:177183453-177206421	protein_coding	192.34	113.975	88.5927	62.583
ENSMUSG00000030144	Clec4d	1.09464	0.0365114	chr6:123262111-123275265	protein_coding	25.5712	22.9788	63.2805	40.4949
ENSMUSG00000052087	Rgs14	1.53877	0.0278576	chr13:55369732-55384687	protein_coding	8.89432	12.8681	37.9683	25.7695
ENSMUSG00000027419	Pcsk2	1.55572	0.0444381	chr2:143546156-143816285	protein_coding	7.78253	9.19153	24.2575	25.7695
ENSMUSG00000022066	Entpd4b	1.62172	0.00917044	chr14:69555424-69585520	protein_coding	36.6891	7.35323	89.6473	44.1762
ENSMUSG00000112614	Gm9030	1.66769	0.0256936	chr10:118253259-118255668	processed_pseudogene	5.55895	12.8681	32.6949	26.6898
ENSMUSG00000067344	Rps25-ps1	1.71147	0.00950415	chr6:145266400-145266777	processed_pseudogene	18.9004	17.4639	20.0388	98.4762
ENSMUSG00000044362	Ccdc89	1.80453	0.0403479	chr7:90426577-90428669	protein_coding	7.78253	4.59577	26.3669	16.5661
ENSMUSG00000027514	Zbp1	2.40642	0.0264976	chr2:173206612-173218923	protein_coding	3.33537	2.75746	13.7108	18.4068
ENSMUSG00000028222	Calb1	2.87672	0.0409828	chr4:15881264-15908064	protein_coding	1.11179	1.83831	13.7108	8.28305
ENSMUSG00000116056	Gm4544	2.98748	0.0119095	chr15:102657111-102660468	lincRNA	3.33537	0.919153	18.9841	13.8051
ENSMUSG00000054204	Alkal2	3.24561	0.0432193	chr12:30884322-30893854	protein_coding	1.11179	0.919153	13.7108	5.52203
ENSMUSG00000097372	Gm26876	4.73008	0.0458627	chr10:128645884-128649811	lincRNA	0	0	5.27337	4.60169
ENSMUSG00000094017	Gm13160	5.15519	0.0196456	chr4:147086358-147086984	processed_pseudogene	0	0	10.5467	2.76102
ENSMUSG00000116561	Gm18335	5.25262	0.0147964	chr16:17702927-17703591	processed_pseudogene	0	0	10.5467	3.68135
ENSMUSG00000074199	Krtdap	5.29748	0.0122145	chr7:30787896-30791097	protein_coding	0	0	6.32805	8.28305
ENSMUSG00000021208	Ifi27l2b	5.39721	0.00924979	chr12:103450898-103457223	protein_coding	0	0	7.38272	8.28305
RLE: relative log expression
